# Supplementary material for: Neighbourhood characteristics and mental disorders in three Chinese cities: multilevel models from the World Mental Health Surveys
Source: PubMed Central journal article supplement — BMJ Open. 2017 Oct 11;7(10):e017679. doi: 10.1136/bmjopen-2017-017679 (PMC5652513; doi:10.1136/bmjopen-2017-017679), 2017-10-11
Supplement: bmjopen-2017-017679.draft_revisions.pdf [file bmjopen-2017-017679.draft_revisions.pdf]

# BMJ Open

BMJ Open is committed to open peer review. As part of this commitment we make the peer review history of every article we publish publicly available.

When an article is published we post the peer reviewers' comments and the authors' responses online. We also post the versions of the paper that were used during peer review. These are the versions that the peer review comments apply to.

The versions of the paper that follow are the versions that were submitted during the peer review process. They are not the versions of record or the final published versions. They should not be cited or distributed as the published version of this manuscript.

BMJ Open is an open access journal and the full, final, typeset and author-corrected version of record of the manuscript is available on our site with no access controls, subscription charges or pay-per-view fees (<http://bmjopen.bmj.com>).

If you have any questions on BMJ Open's open peer review process please email [editorial.bmjopen@bmj.com](mailto:editorial.bmjopen@bmj.com)

# BMJ Open

## Neighborhood characteristics and mental disorders in three large Chinese cities: Multilevel mixed models from the cross-sectional World Mental Health Surveys

|                                 |                                                                                                                                                                                                                                                                                                                                                                                                                                                                                                                                                                                                                                                                                                                                                                                                                                                                                                                                                        |
|---------------------------------|--------------------------------------------------------------------------------------------------------------------------------------------------------------------------------------------------------------------------------------------------------------------------------------------------------------------------------------------------------------------------------------------------------------------------------------------------------------------------------------------------------------------------------------------------------------------------------------------------------------------------------------------------------------------------------------------------------------------------------------------------------------------------------------------------------------------------------------------------------------------------------------------------------------------------------------------------------|
| Journal:                        | <i>BMJ Open</i>                                                                                                                                                                                                                                                                                                                                                                                                                                                                                                                                                                                                                                                                                                                                                                                                                                                                                                                                        |
| Manuscript ID                   | bmjopen-2017-017679                                                                                                                                                                                                                                                                                                                                                                                                                                                                                                                                                                                                                                                                                                                                                                                                                                                                                                                                    |
| Article Type:                   | Research                                                                                                                                                                                                                                                                                                                                                                                                                                                                                                                                                                                                                                                                                                                                                                                                                                                                                                                                               |
| Date Submitted by the Author:   | 09-May-2017                                                                                                                                                                                                                                                                                                                                                                                                                                                                                                                                                                                                                                                                                                                                                                                                                                                                                                                                            |
| Complete List of Authors:       | Chiavegatto Filho, Alexandre; School of Public Health of the University of Sao Paulo, Epidemiology<br>Sampson, Laura; Boston University School of Public Health, Epidemiology<br>Martins, Silvia; Columbia University Mailman School of Public Health, Epidemiology<br>Yu, Shui; Boston University School of Public Health, Epidemiology<br>Huang, Yueqin; Peking University Sixth Hospital, Institute of Mental Health<br>He, Yanling; Shanghai Mental Health Center, Shanghai Jiao Tong University School of Medicine, Department of Psychiatric Epidemiology and Department of Psychiatry<br>Lee, S; Chinese University of Hong Kong, Department of Psychiatry<br>Hu, Chiyi; Shenzhen Institute of Mental Health<br>Zaslavsk, Alan; Harvard Medical School, Department of Health Care Policy<br>Kessler, Ronald; Harvard Medical School, Department of Health Care Policy<br>Galea, Sandro; Boston University School of Public Health, Epidemiology |
| <b>Primary Subject Heading</b>: | Global health                                                                                                                                                                                                                                                                                                                                                                                                                                                                                                                                                                                                                                                                                                                                                                                                                                                                                                                                          |
| Secondary Subject Heading:      | Mental health, Epidemiology, Public health, Research methods, Sociology                                                                                                                                                                                                                                                                                                                                                                                                                                                                                                                                                                                                                                                                                                                                                                                                                                                                                |
| Keywords:                       | Anxiety disorders < PSYCHIATRY, Depression & mood disorders < PSYCHIATRY, Impulse control disorders < PSYCHIATRY, Substance misuse < PSYCHIATRY, PUBLIC HEALTH, STATISTICS & RESEARCH METHODS                                                                                                                                                                                                                                                                                                                                                                                                                                                                                                                                                                                                                                                                                                                                                          |
|                                 |                                                                                                                                                                                                                                                                                                                                                                                                                                                                                                                                                                                                                                                                                                                                                                                                                                                                                                                                                        |

SCHOLARONE™  
Manuscripts

1  
2  
3 Neighborhood characteristics and mental disorders in three large Chinese cities: Multilevel mixed  
4  
5 models from the cross-sectional World Mental Health Surveys  
6  
7  
8

9  
10 Chiavegatto Filho ADP, PhD<sup>1</sup>, Sampson L, BA<sup>2</sup>, Martins SS, MD, PhD<sup>3</sup>, Yu S, MA<sup>2</sup>, Huang Y,  
11 PhD<sup>4</sup>, He Y, MD<sup>5</sup>, Lee S, MBBS<sup>6</sup>, Hu C, MD, PhD<sup>7</sup>, Zaslavsky A, PhD<sup>8</sup>, Kessler RC, PhD<sup>8</sup>, Galea  
12  
13 S, MD, DrPH<sup>2,3</sup>  
14  
15  
16  
17

18  
19 <sup>1</sup>School of Public Health of the University of Sao Paulo, Department of Epidemiology, 715 Av Dr  
20 Arnaldo, Sao Paulo, SP, Brazil 01246-904  
21

22  
23 <sup>2</sup>Boston University School of Public Health, Department of Epidemiology, 715 Albany Street,  
24 Boston, MA, U.S.A. 02118  
25  
26

27  
28 <sup>3</sup>Columbia University Mailman School of Public Health, Department of Epidemiology, 722 West  
29 168<sup>th</sup> Street, New York, NY, U.S.A. 10032  
30

31  
32 <sup>4</sup>Institute of Mental Health/The Sixth Hospital, Peking University. 51 Hua Yuan Bei Road. Haidian  
33 District, Beijing, P. R. China 100191  
34

35  
36 <sup>5</sup>Shanghai Mental Health Center, Shanghai Jiao Tong University School of Medicine, Department of  
37 Psychiatric Epidemiology and Department of Psychiatry, 600 Wan Ping Nan Lu, Shanghai, P. R.  
38 China 200030  
39  
40

41  
42 <sup>6</sup>The Chinese University of Hong Kong, Department of Psychiatry, G/F Multicentre, □Tai Po  
43 Hospital, □Tai Po, Hong Kong, P. R. China.  
44  
45

46  
47 <sup>7</sup>Shenzhen Institute of Mental Health and Shenzhen Kangning Hospital, No.1080, Cuizhu Road,  
48 Luohu District, Shenzhen, Guangdong Province, P. R. China.  
49

50  
51 <sup>8</sup>Harvard University Medical School, Department of Health Care Policy, 180A Longwood Avenue,  
52 Boston, MA, U.S.A. 02115  
53  
54  
55  
56  
57  
58  
59  
60

1  
2  
3 All correspondence should be directed to Sandro Galea, MD, Boston University School of Public  
4  
5 Health, Department of Epidemiology, 715 Albany Street, T301, Boston, MA, U.S.A. 02115.  
6  
7 Telephone: 617-638-4644. Email: [Sgalea@bu.edu](mailto:Sgalea@bu.edu)  
8  
9

10  
11 **Word count:** 3,365  
12  
13

14  
15  
16  
17  
18  
19  
20  
21  
22  
23  
24  
25  
26  
27  
28  
29  
30  
31  
32  
33  
34  
35  
36  
37  
38  
39  
40  
41  
42  
43  
44  
45  
46  
47  
48  
49  
50  
51  
52  
53  
54  
55  
56  
57  
58  
59  
60

For peer review only

**ABSTRACT**

**Objectives:** The rapid growth of urban areas in China in the past few decades has introduced profound changes in family structure and income distribution that could plausibly affect mental health. Although multi-level studies of the influence of area-level socioeconomic factors on mental health have become more common in other parts of the world, a study of this sort has not been carried out in Chinese cities. Our objectives were to examine the associations of two key neighborhood-level variables—relative income and percentage of married individuals living in a neighborhood—with individual-level mental disorders net of individual-level characteristics in three Chinese cities.

**Setting:** Household interviews in Beijing, Shanghai, and Shenzhen, PRC, as part of the cross-sectional World Mental Health Surveys.

**Participants:** 4,072 men and women aged 17 or older

**Primary and secondary outcome measures:** History of mental disorder and past-year mental disorder among both the full sample and those with a history of disorder.

**Results:** About 13% of respondents met criteria for lifetime history of any disorder and 8.2% met criteria for any disorder in the past year. Neighborhood-level proportion of married residents was associated with reduced odds of both lifetime (OR: 0.66, 95% CI: 0.45-0.96; P-value = 0.03) and past-year (OR: 0.59, 95% CI: 0.38-0.91; P-value = 0.014) individual-level disorder, net of individual-level marital status. Neighborhood-level household relative income, in comparison, was not statistically significantly associated with odds of disorder.

**Conclusions:** The proportion of married residents in a neighborhood was significantly inversely associated with prevalence of mental disorders in this sample of Chinese cities. While the relative importance of causation versus selection is unclear from cross-sectional data, causal mechanisms could include neighborhood processes that influence vulnerability to mental disorders in rapidly growing areas of China. Future work may examine these relationships longitudinally.

1  
2  
3 **Keywords:** Anxiety disorders, depression & mood disorders, impulse control disorders, substance  
4 misuse, public health, statistics & research methods  
5  
6  
7  
8  
9  
10

## 11 **STRENGTHS AND LIMITATIONS OF THIS STUDY**

### 14 **Strengths of this study:**

- 16 • We are the first to our knowledge to investigate the association of neighborhood  
17 characteristics with mental disorders in large urban areas of China  
18
- 19 • We completed sensitivity analyses of different types of regression models in order to  
20 account for both the complex survey design and the multilevel nature of the analysis, and  
21 found that our findings are robust  
22
- 23 • We used statistical weights in order for ensure that our sample was representative of the  
24 demographics of the cities included  
25  
26  
27  
28  
29  
30  
31

### 32 **Limitations of this study:**

- 33 • The cross-sectional design does not allow us to examine true temporality of our exposures  
34 and outcomes  
35  
36
- 37 • The data were collected from 2002-2007  
38  
39  
40  
41  
42  
43  
44  
45  
46  
47  
48  
49  
50  
51  
52  
53  
54  
55  
56  
57  
58  
59  
60

## INTRODUCTION

China, the world's most populous country, has recently experienced the largest internal migration process in human history; the proportion of the population living in urban areas increased from 36.2% in 2000 to 50.0% in 2011.(1, 2) Mental disorders are an important concern in urban areas with rapid and unequal growth.(3) Despite important early gains in personal well-being, recent studies have suggested that the negative effects of rapid urbanization on the mental health of Chinese residents may have now caught up with the potential benefits of economic growth.(4, 5) Results from the Global Burden of Disease Study found that mental disorders accounted for seven of the top 20 causes of years living with a disability (YLD) in China, with all disorders increasing in absolute terms from 1990 to 2010.(4) It is estimated that around 173 million Chinese adults have a mental disorder, 158 million of whom have never received any professional treatment.(6)

Based on this literature, it is becoming increasingly important to characterize the risk and protective factors for mental disorders in urban China. Individual factors such as demographics and socioeconomic position have long been known to be associated with mental disorders in urban areas worldwide, but neighborhood characteristics are a growing area of concern, especially in rapidly developing countries.(7, 8) Neighborhoods are responsible for the conditions in which people are born, grow, live, and age; neighborhood-level characteristics may represent both an important driver of mental health and an opportunity for prevention.(9)

Extant work has shown that neighborhood characteristics such as violence, economic disadvantage, social interactions, and income inequality are associated with depression and other mental disorders in urban areas.(10, 11) While research has examined the association between neighborhood factors and physical health in Shanghai,(12) no previous analyses to our knowledge have assessed associations of neighborhood-level factors with mental disorders in Chinese cities.

1  
2  
3 To better understand the potential role of neighborhood factors in determining mental health, we  
4 analyzed community epidemiological survey data collected in three of the largest urban areas in  
5 China: Shanghai, Beijing, and Shenzhen. We focused on two neighborhood-level contextual  
6 variables that we hypothesized to be associated significantly with prevalence of mental disorders:  
7 neighborhood-level income and percent of neighborhood residents who are married.  
8  
9  
10  
11  
12

13  
14  
15  
16 The focus on income is based on abundant evidence that group-level income is associated with  
17 health indicators in the U.S., even when taking into account individual income.(13) Neighborhood-  
18 level income could be associated with availability of salutary resources that would otherwise not be  
19 present in particular neighborhoods.(14) Further, neighborhood-level income may be associated  
20 with strong pro-social forces such as social cohesion that are themselves linked to better health.(15)  
21  
22  
23  
24  
25  
26

27 The focus on marriage is motivated by the finding of previous studies that in China, family  
28 disruption is associated with a higher risk of mental disorder, possibly a manifestation of the  
29 importance of family-oriented life in Chinese culture.(16, 17) In addition, reports of the importance  
30 of family arrangements in overall community life in China, such as social interactions and political  
31 participation, suggest that neighborhood-level family relations could plausibly have an effect on  
32 mental disorders after accounting for individual marital and relationship status.  
33  
34  
35  
36  
37  
38  
39  
40  
41

## 42 **METHODS**

### 43 **Sample**

44 The sample was comprised of residents aged 17 or older in the cities of Shenzhen, Beijing, and  
45 Shanghai who participated in the World Mental Health (WMH) Survey Initiative (Table 1). The  
46 Beijing and Shanghai surveys were carried out in 2002-2003 and the Shenzhen survey in 2006-2007.  
47  
48 The samples in all three cities were based on a multi-stage area clustered household survey design,  
49 described in detail elsewhere.(16, 18, 19)  
50  
51  
52  
53  
54  
55  
56  
57  
58  
59  
60



**Table 1.** WMH Sample Characteristics by City

| City                  | Survey <sup>a</sup> | Sample characteristics                                                                  | Field dates | Age range | Sample size |         | Response rate <sup>b</sup> |
|-----------------------|---------------------|-----------------------------------------------------------------------------------------|-------------|-----------|-------------|---------|----------------------------|
|                       |                     |                                                                                         |             |           | Part I      | Part II |                            |
| Beijing /<br>Shanghai | B-WMH /<br>S-WMH    | Beijing and Shanghai metropolitan areas                                                 | 2002-3      | 18-70     | 5,201       | 1,628   | 74.7                       |
| Shenzhen              | Shenzhen            | Shenzhen metropolitan area. Included temporary residents as well as household residents | 2006-7      | 17-88     | 7,134       | 2,476   | 80.0                       |
| <b>TOTAL</b>          |                     |                                                                                         |             |           | (12,335)    | (4,104) | 77.7                       |

<sup>a</sup> B-WMH (The Beijing World Mental Health Survey); S-WMH (The Shanghai World Mental Health Survey)

<sup>b</sup> The response rate is calculated as the ratio of the number of households in which an interview was completed to the number of households originally sampled, excluding from the denominator households known not to be eligible either because of being vacant at the time of initial contact or because the residents were unable to speak the designated languages of the survey. The weighted average response rate is 77.7%.

1  
2  
3  
4  
5  
6  
7  
8  
9  
10  
11  
12  
13  
14  
15  
16  
17  
18  
19  
20  
21  
22  
23  
24  
25  
26  
27  
28  
29  
30  
31  
32  
33  
34  
35  
36  
37  
38  
39  
40  
41  
42  
43  
44  
45  
46  
47  
48  
49  
50  
51  
52  
53  
54  
55  
56  
57  
58  
59  
60

Neighborhoods in this sample consisted of neighborhood committees (NCs), the official, local community organizations in urban China that consist of 100-700 households, and that were also used as the primary sampling unit in the WMH study in China.<sup>(16)</sup> In Shenzhen, work units (e.g., schools or companies) were also used as primary sampling units in addition to NCs, in order to capture temporary residents living in the city for at least one year. After combining Beijing, Shanghai and Shenzhen and including both NCs and work units under the definition of neighborhood for this study, our sample consisted of 143 total neighborhoods.

All participants completed Part I of the survey, which assessed core disorders and demographics, while a probability subsample consisting of all respondents who met lifetime criteria for any Part I disorder plus a probability subsample of 25% of other Part I respondents completed Part II (n = 2,476 in Shenzhen, n = 914 in Beijing, and n = 714 in Shanghai; Table 1). The sample was weighted to adjust for differential sampling of Part I respondents into Part II, for differential probability of selection within households (one respondent selected for interview in each household regardless of household size, creating an inverse association between number of household residents and probability of selection), and to match socio-demographic distributions in the respective cities.<sup>(19)</sup> The weighted Part II sample represents the distribution of mental disorders and marital status in the entire sample without bias and adjusts the sample for minor discrepancies from the population on the distributions of age, sex, and marital status; the analyses reported in this paper are based on this weighted Part II sample, with the exception of 32 respondents (0.2% of the weighted Part II sample) who refused to answer or answered “don’t know” on a key covariate, resulting in a final analytic sample of 4,072 respondents.

## Data collection

1  
2  
3 WMH interviews were administered face-to-face in the homes of respondents by trained lay  
4 interviewers. The WMH interview schedule was translated using a standardized World Health  
5 Organization (WHO) translation, back-translation, and harmonization protocol.(20) Written,  
6 informed consent after a full description of the study was obtained from all participants before  
7 conducting the surveys. These consent procedures were approved by the Institutional Review  
8 Boards of the Shenzhen Institute of Mental Health and the Research Center for Contemporary China  
9 in Beijing.  
10  
11  
12  
13  
14  
15  
16  
17  
18  
19

## 20 **Measures**

### 21 *Primary outcome: Mental disorders*

22  
23 Mental disorders were assessed with the WHO Composite International Diagnostic Interview (CIDI)  
24 Version 3.0.(21) The disorders assessed included anxiety (posttraumatic stress disorder, panic  
25 disorder, specific phobia, social phobia, agoraphobia, adult separation anxiety, generalized anxiety  
26 disorder), mood (major depressive disorder, dysthymic disorder, bipolar/sub-threshold bipolar  
27 disorders), behavioral (intermittent explosive disorder, oppositional defiant disorder, conduct  
28 disorder, attention-deficit/hyperactivity disorder), and substance use (alcohol and drug abuse with or  
29 without dependence) disorders. Diagnoses were based on the definitions and criteria of the  
30 American Psychiatric Association's Diagnostic and Statistical Manual of Mental Disorders Fourth  
31 Edition (DSM IV).(22) Both lifetime and past-year diagnoses were assessed. Clinical calibration  
32 studies carried out in a number of WMH countries confirmed good concordance of DSM-IV  
33 diagnoses based on the CIDI with diagnoses based on blinded clinical reappraisal interviews using  
34 the Structured Clinical Interview for DSM-IV (SCID).(23, 24) Due to concern about recall,  
35 disorders defined as beginning in childhood (attention-deficit/hyperactivity disorder, conduct  
36 disorder, and oppositional defiant disorder) were assessed only among respondents aged 18–44.  
37  
38  
39  
40  
41  
42  
43  
44  
45  
46  
47  
48  
49  
50  
51  
52  
53  
54  
55  
56  
57

### 58 *Individual-level fixed effects*

1  
2  
3 Individual-level covariates chosen for this analysis included age (categorized into 35-49 and 50+ vs.  
4 18-34), sex (female vs. not), marital status (married vs. not), employment status (unemployed vs. not  
5 employed vs. “don’t know”/refused), migrant status (migrant to a large city vs. not, where migrant  
6 was defined as not “raised mostly in a large city”), income, and education. Individual income was  
7 defined as the combined income of all family members divided by number of family members. The  
8 ratio of individual income to the weighted median city-level income was then calculated and split  
9 into tertiles to represent categorical levels of relative individual income. Individual education was  
10 categorized as being above vs. below the median of country-level education.  
11  
12  
13  
14  
15  
16  
17  
18  
19  
20  
21  
22

### 23 *Individual-level random effects*

24 A random intercept at the neighborhood level was included in all models, in order to allow the  
25 predicted probabilities from each model to vary by neighborhood. Additionally, random coefficients  
26 for individual-level income were included in the main models predicting lifetime and past-year  
27 disorder, to assess whether the effects of individual-level income varied across neighborhoods and  
28 act as the error term for tests of associations of these variables with diagnostic outcomes.  
29  
30  
31  
32  
33  
34  
35  
36  
37

### 38 *Neighborhood-level fixed effects*

39 We divided the median income in each neighborhood by the city-level median to calculate relative  
40 neighborhood-level income. The neighborhood-level marital status variable was calculated as the  
41 weighted proportion of married individuals in each stratum. Each of these variables was then split  
42 into tertiles to classify each neighborhood as high, intermediate, or low on each of these two  
43 neighborhood-level measures, and used as categorical fixed effects.  
44  
45  
46  
47  
48  
49  
50  
51  
52

## 53 **Data Analysis**

54 Data analysis was carried out using SAS version 9.4. We used SAS survey procedures to calculate  
55 valid design-based standard errors for frequencies and means. Weighted, multilevel, multivariate,  
56  
57  
58  
59  
60

1  
2  
3 mixed logistic regression models were estimated using Proc Glimmix with neighborhood as a  
4 repeated subject and both fixed and random effects varying at the neighborhood level. One set of  
5 models predicted lifetime history and past-year disorders in the total sample, while another predicted  
6 persistence, defined as the probability of past-year disorders in the subsample of respondents with  
7 history of disorder that began prior to the past year.  
8  
9  
10  
11  
12

13  
14  
15  
16 For sensitivity analyses, we also ran multilevel models using a jackknife resampling method for  
17 estimation of variance and SAS Surveylogistic regressions without repeated measures correction,  
18 and found very similar results across all three methods, suggesting robust findings (see appendix  
19 tables).  
20  
21  
22  
23  
24  
25  
26  
27  
28

## 29 **RESULTS**

### 30 **Prevalence of mental disorders (outcome)**

31  
32 Thirteen percent of the weighted analytic sample met criteria for lifetime history of any DSM-  
33 IV/CIDI disorder, and 8.2% met criteria for past-year disorder (Table 2). Over half (62.7%) of those  
34 who experienced disorder that onset prior to the past year (n = 1,022) also met criteria for past-year  
35 diagnosis (persistence).  
36  
37  
38  
39  
40  
41  
42  
43  
44  
45  
46  
47  
48  
49  
50  
51  
52  
53  
54  
55  
56  
57  
58  
59  
60

**Table 2.** Prevalence and Means of Independent and Dependent Variables Among 4,072 Urban China

Residents

|                                                                | Unweighted<br>n | Weighted % | Weighted<br>mean | Weighted design-<br>based SE <sup>a</sup> |
|----------------------------------------------------------------|-----------------|------------|------------------|-------------------------------------------|
| <i>Cities</i>                                                  |                 |            |                  |                                           |
| Beijing                                                        | 914             | 22.31%     | -                | 1.38%                                     |
| Shanghai                                                       | 713             | 17.43%     | -                | 0.90%                                     |
| Shenzhen                                                       | 2445            | 60.26%     | -                | 1.34%                                     |
| <i>Individual-level variables</i>                              |                 |            |                  |                                           |
| Age 35-49                                                      | 1353            | 24.11%     | -                | 0.84%                                     |
| Age 50+                                                        | 673             | 13.93%     | -                | 0.73%                                     |
| Female                                                         | 2014            | 49.26%     | -                | 1.19%                                     |
| Bottom tertile of ratio of individual<br>income to city income | 1278            | 33.16%     | 0.39             | 0.01                                      |
| Middle tertile of ratio of individual<br>income to city income | 1299            | 33.87%     | 1.05             | 0.01                                      |
| Top tertile of ratio of individual<br>income to city income    | 1495            | 32.98%     | 3.48             | 0.11                                      |
| In top 50% of country-level<br>education                       | 2770            | 64.30%     | -                | 1.18%                                     |
| Married                                                        | 2695            | 59.04%     | -                | 1.05%                                     |
| Migrant to megacity                                            | 2526            | 63.89%     | -                | 1.18%                                     |
| Unemployed                                                     | 163             | 3.21%      | -                | 0.45%                                     |
| <i>Mental disorders</i>                                        |                 |            |                  |                                           |

|    |                                         |      |        |        |       |
|----|-----------------------------------------|------|--------|--------|-------|
| 1  |                                         |      |        |        |       |
| 2  |                                         |      |        |        |       |
| 3  | Any lifetime disorder                   | 1091 | 12.96% | -      | 0.71% |
| 4  |                                         |      |        |        |       |
| 5  | Any past-year disorder                  | 698  | 8.23%  | -      | 0.54% |
| 6  |                                         |      |        |        |       |
| 7  | Any past-year disorder among those      |      |        |        |       |
| 8  |                                         |      |        |        |       |
| 9  | with lifetime history prior to the past | 640  | 62.68% | -      | 2.01% |
| 10 |                                         |      |        |        |       |
| 11 | 12 months                               |      |        |        |       |
| 12 |                                         |      |        |        |       |
| 13 |                                         |      |        |        |       |
| 14 | <i>Neighborhood-level variables</i>     |      |        |        |       |
| 15 |                                         |      |        |        |       |
| 16 | Bottom tertile of ratio of              |      |        |        |       |
| 17 |                                         | 1428 | 34.97% | 0.66   | 0.01  |
| 18 | neighborhood income to city income      |      |        |        |       |
| 19 |                                         |      |        |        |       |
| 20 | Middle tertile of ratio of              |      |        |        |       |
| 21 |                                         | 1207 | 32.22% | 0.97   | 0.00  |
| 22 | neighborhood income to city income      |      |        |        |       |
| 23 |                                         |      |        |        |       |
| 24 | Top tertile of ratio of neighborhood    |      |        |        |       |
| 25 |                                         | 1437 | 32.81% | 1.56   | 0.02  |
| 26 | income to city income                   |      |        |        |       |
| 27 |                                         |      |        |        |       |
| 28 |                                         |      |        |        |       |
| 29 | Bottom tertile of % married             | 1163 | 33.98% | 40.92% | 0.38% |
| 30 |                                         |      |        |        |       |
| 31 | Middle tertile of % married             | 1223 | 33.41% | 65.11% | 0.15% |
| 32 |                                         |      |        |        |       |
| 33 | Top tertile of % married                | 1686 | 32.61% | 79.83% | 0.19% |
| 34 |                                         |      |        |        |       |

---

<sup>a</sup> SE = Standard error

### **Distributions of independent variables**

About half (49.3%) of respondents were female; 24.1% were 35 to 49 years old; 13.9% were 50 years or older; 59.0% were married; 63.9% were migrants to a large city; and 3.2% were unemployed (Table 2). The mean ratio of individual income to city income was 0.39, 1.05, and 3.48 in the bottom, middle, and top tertile, respectively.

The mean of the relative neighborhood-level income was 0.66 for the bottom tertile, 0.97 for the middle tertile, and 1.56 for the top tertile. Neighborhood-level mean percentages of married individuals for tertile categories were 40.9%, 65.1%, and 79.8% respectively.

### **Lifetime mental disorder models**

Table 3 reports the multivariate, logistic regressions for individual variables only (first column), neighborhood-level income as the main independent variable of interest (second column), and neighborhood-level percentage of married individuals as the main independent variable of interest (third column) with any lifetime disorder as the outcome. The associations between individual fixed effects and mental disorders were modest, with the exception of the significant associations of lower odds of disorder with being female (OR: 0.76 in all models) and with being in the middle age group compared to the youngest (OR's range from 0.69 to 0.74).



**Table 3.** Logistic Multilevel, Multivariate Mixed Regression Models Predicting Any Lifetime Disorder Among 4,072 Urban China Residents<sup>a</sup>

|                                                             | Odds ratio | 95% CI Lower limit | 95% CI Upper limit | Odds ratio | 95% CI Lower limit | 95% CI Upper limit | Odds ratio | 95% CI Lower limit | 95% CI Upper limit |
|-------------------------------------------------------------|------------|--------------------|--------------------|------------|--------------------|--------------------|------------|--------------------|--------------------|
| <i>Individual-level fixed effects</i>                       |            |                    |                    |            |                    |                    |            |                    |                    |
| Age 35-49                                                   | 0.69*      | 0.49               | 0.98               | 0.70*      | 0.50               | 0.98               | 0.74       | 0.52               | 1.04               |
| Age 50+                                                     | 0.76       | 0.47               | 1.24               | 0.76       | 0.47               | 1.24               | 0.81       | 0.50               | 1.32               |
| Female                                                      | 0.76*      | 0.59               | 0.99               | 0.76*      | 0.59               | 0.98               | 0.76*      | 0.59               | 0.98               |
| Middle tertile of ratio of individual income to city income | 0.86       | 0.65               | 1.14               | 0.86       | 0.64               | 1.14               | 0.85       | 0.65               | 1.12               |
| Top tertile of ratio of individual income to city income    | 1.14       | 0.86               | 1.51               | 1.14       | 0.85               | 1.53               | 1.12       | 0.84               | 1.48               |
| In top 50% of country-level education                       | 1.26       | 0.95               | 1.67               | 1.26       | 0.95               | 1.68               | 1.25       | 0.95               | 1.65               |
| Married                                                     | 0.93       | 0.69               | 1.24               | 0.93       | 0.69               | 1.26               | 0.98       | 0.72               | 1.34               |
| Migrant to megacity                                         | 1.10       | 0.77               | 1.56               | 1.09       | 0.77               | 1.56               | 1.06       | 0.74               | 1.52               |
| Unemployed                                                  | 1.76       | 0.85               | 3.63               | 1.78       | 0.86               | 3.66               | 1.87       | 0.90               | 3.90               |
| <i>Neighborhood-level fixed effects</i>                     |            |                    |                    |            |                    |                    |            |                    |                    |
| Middle tertile of ratio of neighborhood income to           |            |                    |                    | 1.16       | 0.85               | 1.58               |            |                    |                    |

|    |                          |      |      |      |                 |
|----|--------------------------|------|------|------|-----------------|
| 1  |                          |      |      |      |                 |
| 2  |                          |      |      |      |                 |
| 3  | city income              |      |      |      |                 |
| 4  |                          |      |      |      |                 |
| 5  | Top tertile of ratio of  |      |      |      |                 |
| 6  |                          |      |      |      |                 |
| 7  | neighborhood income to   | 0.99 | 0.73 | 1.34 |                 |
| 8  |                          |      |      |      |                 |
| 9  | city income              |      |      |      |                 |
| 10 |                          |      |      |      |                 |
| 11 | Middle tertile of %      |      |      |      |                 |
| 12 |                          |      |      |      |                 |
| 13 | married                  |      |      |      | 0.72 0.49 1.05  |
| 14 |                          |      |      |      |                 |
| 15 | Top tertile of % married |      |      |      | 0.66* 0.45 0.96 |
| 16 |                          |      |      |      |                 |
| 17 |                          |      |      |      |                 |

\* =  $P < 0.05$

<sup>a</sup> Models include the above variables as well as fixed effects for city and for having a missing value on individual unemployment, as well as a random intercept and a random effect of relative individual income

Higher neighborhood-level income was not statistically significant in this model (second column), but neighborhood-level percentage of married individuals (third column) was statistically associated with lower odds of disorder (OR: 0.72, 95% CI: 0.49-1.05 for the middle tertile compared to the lowest, and OR: 0.66, 95% CI: 0.45-0.96 for the highest tertile compared to the lowest).

#### Past-year mental disorder models

Models for past-year mental disorders are presented on Table 4, with the same independent variables included as in Table 3. Being 35 to 49 years old was consistently significantly associated with lower odds of past-year mental disorder in comparison with younger individuals for each model (OR's ranged from 0.57 to 0.61). Having a high educational attainment (OR's: 1.46 to 1.49) and being unemployed (OR's: 2.66 to 2.87) were significantly associated with *higher* odds of mental disorder.

**Table 4.** Logistic Multilevel, Multivariate Mixed Regression Models Predicting Any Past-Year Disorder Among 4,072 Urban China Residents <sup>a</sup>

|                                                             | 95% CI |       | 95% CI |       | 95% CI |       | 95% CI |       | 95% CI |  |
|-------------------------------------------------------------|--------|-------|--------|-------|--------|-------|--------|-------|--------|--|
|                                                             | Odds   | Lower | Upper  | Odds  | Lower  | Upper | Odds   | Lower | Upper  |  |
|                                                             | ratio  | limit | limit  | ratio | limit  | limit | ratio  | limit | limit  |  |
| <i>Individual-level fixed effects</i>                       |        |       |        |       |        |       |        |       |        |  |
| Age 35-49                                                   | 0.57*  | 0.38  | 0.84   | 0.57* | 0.38   | 0.83  | 0.61*  | 0.41  | 0.90   |  |
| Age 50+                                                     | 0.61   | 0.36  | 1.04   | 0.61  | 0.36   | 1.04  | 0.67   | 0.39  | 1.13   |  |
| Female                                                      | 0.86   | 0.64  | 1.15   | 0.86  | 0.64   | 1.15  | 0.85   | 0.63  | 1.14   |  |
| Middle tertile of ratio of individual income to city income | 0.91   | 0.65  | 1.27   | 0.91  | 0.64   | 1.30  | 0.89   | 0.64  | 1.23   |  |

|    |                                    |       |      |      |       |      |      |       |      |      |
|----|------------------------------------|-------|------|------|-------|------|------|-------|------|------|
| 1  |                                    |       |      |      |       |      |      |       |      |      |
| 2  |                                    |       |      |      |       |      |      |       |      |      |
| 3  | Top tertile of ratio of individual |       |      |      |       |      |      |       |      |      |
| 4  | income to city income              | 1.06  | 0.77 | 1.45 | 1.09  | 0.78 | 1.52 | 1.03  | 0.74 | 1.41 |
| 5  |                                    |       |      |      |       |      |      |       |      |      |
| 6  |                                    |       |      |      |       |      |      |       |      |      |
| 7  | In top 50% of country-level        |       |      |      |       |      |      |       |      |      |
| 8  | education                          | 1.47* | 1.02 | 2.11 | 1.49* | 1.02 | 2.17 | 1.46* | 1.02 | 2.10 |
| 9  |                                    |       |      |      |       |      |      |       |      |      |
| 10 |                                    |       |      |      |       |      |      |       |      |      |
| 11 | Married                            | 1.09  | 0.77 | 1.55 | 1.11  | 0.77 | 1.58 | 1.17  | 0.81 | 1.70 |
| 12 |                                    |       |      |      |       |      |      |       |      |      |
| 13 | Migrant to megacity                | 1.09  | 0.72 | 1.64 | 1.07  | 0.71 | 1.62 | 1.04  | 0.69 | 1.58 |
| 14 |                                    |       |      |      |       |      |      |       |      |      |
| 15 | Unemployed                         | 2.66* | 1.33 | 5.32 | 2.69* | 1.36 | 5.32 | 2.87* | 1.43 | 5.75 |
| 16 |                                    |       |      |      |       |      |      |       |      |      |
| 17 |                                    |       |      |      |       |      |      |       |      |      |
| 18 | <i>Neighborhood-level fixed</i>    |       |      |      |       |      |      |       |      |      |
| 19 | <i>effects</i>                     |       |      |      |       |      |      |       |      |      |
| 20 |                                    |       |      |      |       |      |      |       |      |      |
| 21 |                                    |       |      |      |       |      |      |       |      |      |
| 22 | Middle tertile of ratio of         |       |      |      |       |      |      |       |      |      |
| 23 | neighborhood income to city        |       |      |      | 1.22  | 0.84 | 1.78 |       |      |      |
| 24 |                                    |       |      |      |       |      |      |       |      |      |
| 25 | income                             |       |      |      |       |      |      |       |      |      |
| 26 |                                    |       |      |      |       |      |      |       |      |      |
| 27 |                                    |       |      |      |       |      |      |       |      |      |
| 28 |                                    |       |      |      |       |      |      |       |      |      |
| 29 | Top tertile of ratio of            |       |      |      |       |      |      |       |      |      |
| 30 | neighborhood income to city        |       |      |      | 0.86  | 0.58 | 1.26 |       |      |      |
| 31 |                                    |       |      |      |       |      |      |       |      |      |
| 32 | income                             |       |      |      |       |      |      |       |      |      |
| 33 |                                    |       |      |      |       |      |      |       |      |      |
| 34 |                                    |       |      |      |       |      |      |       |      |      |
| 35 |                                    |       |      |      |       |      |      |       |      |      |
| 36 | Middle tertile of % married        |       |      |      |       |      |      | 0.78  | 0.50 | 1.24 |
| 37 |                                    |       |      |      |       |      |      |       |      |      |
| 38 | Top tertile of % married           |       |      |      |       |      |      | 0.59* | 0.38 | 0.91 |
| 39 |                                    |       |      |      |       |      |      |       |      |      |

---

\* =  $P < 0.05$

<sup>a</sup> Models include the above variables as well as fixed effects for city and for having a missing value on individual unemployment, as well as a random intercept and a random effect of relative individual income

The second model in Table 4 shows that again, there was not a statistically significant association between relative neighborhood-level income and odds of mental disorder. However, a higher neighborhood-level percentage of married individuals (third column) was again significantly associated with lower odds of disorder (OR: 0.78, 95% CI: 0.50-1.24 for the middle tertile compared to the lowest, and OR: 0.59, 95% CI: 0.38-0.91 for the highest tertile compared to the lowest).

### Persistence models

Table 5 shows the same models as in Table 4, but only among individuals with a mental disorder that onset prior to the past year (n=1,022). Older age was significantly associated with lower odds of past-year mental disorder (OR's: 0.44 to 0.50 for ages 35-49 and OR's: 0.44 to 0.47 for ages 50+), while being married as an individual was consistently associated with higher odds (OR range: 1.61-1.72).

Table 5. Logistic Multilevel, Multivariate Mixed Regression Models Predicting Any Past-Year Disorder

Among Those With Lifetime Disorder Prior to Past Year (n = 1,022) <sup>a</sup>

|                                       | 95% CI |       | 95% CI |       | 95% CI |       | 95% CI |       | 95% CI |  |
|---------------------------------------|--------|-------|--------|-------|--------|-------|--------|-------|--------|--|
|                                       | Odds   | Lower | Upper  | Odds  | Lower  | Upper | Odds   | Lower | Upper  |  |
|                                       | ratio  | limit | limit  | ratio | limit  | limit | ratio  | limit | limit  |  |
| <i>Individual-level fixed effects</i> |        |       |        |       |        |       |        |       |        |  |
| Age 35-49                             | 0.45*  | 0.25  | 0.82   | 0.44* | 0.24   | 0.80  | 0.50*  | 0.27  | 0.90   |  |
| Age 50+                               | 0.44*  | 0.22  | 0.91   | 0.44* | 0.21   | 0.92  | 0.47*  | 0.23  | 0.98   |  |
| Female                                | 1.26   | 0.84  | 1.88   | 1.32  | 0.89   | 1.95  | 1.27   | 0.85  | 1.88   |  |
| Middle tertile of ratio of            | 0.98   | 0.57  | 1.68   | 1.01  | 0.59   | 1.73  | 0.94   | 0.55  | 1.61   |  |

|                                 |       |      |       |      |      |       |       |      |       |  |
|---------------------------------|-------|------|-------|------|------|-------|-------|------|-------|--|
| individual income to city       |       |      |       |      |      |       |       |      |       |  |
| income                          |       |      |       |      |      |       |       |      |       |  |
| Top tertile of ratio of         |       |      |       |      |      |       |       |      |       |  |
| individual income to city       | 0.68  | 0.36 | 1.28  | 0.76 | 0.42 | 1.38  | 0.66  | 0.36 | 1.22  |  |
| income                          |       |      |       |      |      |       |       |      |       |  |
| In top 50% of country-          |       |      |       |      |      |       |       |      |       |  |
| level education                 | 1.32  | 0.77 | 2.28  | 1.36 | 0.79 | 2.35  | 1.32  | 0.77 | 2.25  |  |
| Married                         | 1.64* | 1.01 | 2.67  | 1.61 | 0.99 | 2.61  | 1.72* | 1.07 | 2.78  |  |
| Migrant to megacity             | 0.87  | 0.54 | 1.42  | 0.83 | 0.51 | 1.34  | 0.89  | 0.56 | 1.42  |  |
| Unemployed                      | 2.61  | 0.56 | 12.27 | 2.69 | 0.61 | 11.90 | 2.77  | 0.65 | 11.80 |  |
| <i>Neighborhood-level fixed</i> |       |      |       |      |      |       |       |      |       |  |
| <i>effects</i>                  |       |      |       |      |      |       |       |      |       |  |
| Middle tertile of ratio of      |       |      |       |      |      |       |       |      |       |  |
| neighborhood income to          |       |      |       | 1.15 | 0.65 | 2.04  |       |      |       |  |
| city income                     |       |      |       |      |      |       |       |      |       |  |
| Top tertile of ratio of         |       |      |       |      |      |       |       |      |       |  |
| neighborhood income to          |       |      |       | 0.60 | 0.33 | 1.10  |       |      |       |  |
| city income                     |       |      |       |      |      |       |       |      |       |  |
| Middle tertile of %             |       |      |       |      |      |       | 1.00  | 0.55 | 1.82  |  |
| married                         |       |      |       |      |      |       |       |      |       |  |
| Top tertile of % married        |       |      |       |      |      |       | 0.67  | 0.38 | 1.17  |  |

---

\* =  $P < 0.05$

<sup>a</sup> Models include the above variables as well as fixed effects for city and for having a missing value on individual unemployment, as well as a random intercept

1  
2  
3 Neither of the neighborhood-level fixed effects in this subsample were statistically significant at the  
4  
5 alpha=0.05 level (columns 2 and 3). However, the top tertile of neighborhood-level income was  
6  
7 borderline significant (OR: 0.60, 95% CI: 0.33-1.10), suggesting a potentially protective negative  
8  
9 association of higher neighborhood-level income with persistence of mental disorder.  
10  
11

## 12 13 14 15 16 **DISCUSSION**

17  
18 Using data from three of the largest cities in China with multilevel mixed models, we found that  
19  
20 residence in neighborhoods with a higher proportion of married individuals was associated with  
21  
22 lower odds of both past-year and lifetime mental disorders, even after accounting for individual-  
23  
24 level marital status. Contrary to our expectations, living in a neighborhood with a higher relative  
25  
26 per-capita income was not significantly associated with lower odds of disorder, although it was  
27  
28 borderline significant in the subsample of respondents with a previous history of mental disorders,  
29  
30 suggesting that contextual income may have a more important association with persistence of mental  
31  
32 disorders than with onset.  
33  
34

35  
36  
37 These results should be interpreted in the context of several limitations. First, due to the cross-  
38  
39 sectional nature of this study, we cannot exclude the possibility of reverse causation that  
40  
41 concentrates individuals with a mental disorder in neighborhoods with fewer married individuals  
42  
43 and lower income. Second, the study relied on data from fully-structured lay interviews instead of  
44  
45 semi-structured clinician-administered interviews, which could affect both estimates of disease  
46  
47 prevalence and of age of onset, although the diagnostic assessments were validated with blinded  
48  
49 clinical reappraisal interviews.(24)  
50  
51

52  
53  
54  
55 Third, our sample is not necessarily representative of every large urban area of China. Even across  
56  
57 the three cities we assessed, there are important differences, most notably the fact that Shanghai and  
58  
59  
60

1  
2  
3 Beijing are two of the oldest large cities in China, while Shenzhen is a migrant industrial city that  
4 evolved based on its designation in 1980 as the first PRC Special Economic Zone. In our sample,  
5 Beijing had the highest prevalence of disorder, followed by Shenzhen and then Shanghai, and we  
6 included city as a control variable in our models. Further, socioeconomic characteristics likely have  
7 differential effects on the health of migrants depending on the culture and area of origin,(25) which  
8 could modify our results; some new neighborhoods in China, especially in Shenzhen, are composed  
9 of migrants coming from the same area of origin and age living in small areas such as  
10 dormitories,(26) where high social cohesion could influence mental health outcomes. Our analysis  
11 of migration was limited by the absence of detailed data on these subjects' area of origin and current  
12 housing. However, we did statistically control for whether the responded grew up mostly in a large  
13 city. Future studies should investigate the associations of these factors with mental disorders in a  
14 sample with more detailed information on true migration status.  
15  
16  
17  
18  
19  
20  
21  
22  
23  
24  
25  
26  
27  
28  
29  
30

31 Despite these limitations, our study is the first to investigate the associations of neighborhood  
32 characteristics with mental disorders in large urban areas of China, providing data that may be  
33 consistent with previous concerns about the mental health effects of community disruption created  
34 by rapid urbanization.(27, 28)  
35  
36  
37  
38  
39  
40  
41

42 At the individual level, two mechanisms have been proposed to explain general associations  
43 between lower income or social capital with higher odds of mental disorders: social causation and  
44 social selection.(29, 30) The latter posits that individuals with mental disorders have a predisposition  
45 to drift into lower socioeconomic positions, while the former attributes the association to the stress  
46 and adversity that comes with having low socioeconomic status. We were not able to test these  
47 hypotheses directly due to the cross-sectional nature of our data, but our results suggest that, after  
48 controlling for individual income, the aggregate income of all individuals in the same area of  
49 residence may be associated with persistent mental disorders. The pathways through which  
50  
51  
52  
53  
54  
55  
56  
57  
58  
59  
60



1  
2  
3 neighborhood characteristics may affect mental disorders are likely multifactorial and at least  
4  
5 partially mediated by individual socioeconomic status, but neighborhood features and social  
6  
7 cohesion could help to explain some of this association.(10) First, low-income neighborhoods or  
8  
9 those with less social capital lack important resources protect against mental disorders, such as  
10  
11 adequate housing, green spaces, and mental health facilities.(31, 32) Second, individuals living in  
12  
13 poorer neighborhoods report lower neighborhood social cohesion,(33) which may increase  
14  
15 vulnerability to stress and mental disorders.  
16  
17  
18  
19

20 Similarly, individual marital status has been previously associated with mental disorders.(34, 35)  
21  
22 The inverse association of neighborhood-level percentage of married individuals and mental  
23  
24 disorders found in our study suggests a protective community effect of marriage, possibly through  
25  
26 its effect on social cohesion. Living in a neighborhood with more married individuals has been  
27  
28 associated with higher neighborhood satisfaction,(36) and marital status is frequently associated  
29  
30 with more political participation and social support.(17) We were not able to directly analyze  
31  
32 neighborhood social cohesion with WMH data, but we welcome new studies that test this  
33  
34 hypothesis.  
35  
36  
37  
38  
39

40 Despite our focus on contextual variables in this analysis, we also found that being married was  
41  
42 associated at the individual level with higher odds of persistence of mental disorder, and that being  
43  
44 more highly educated was associated at the individual level with higher odds of past-year mental  
45  
46 disorders, both of which may be unexpected in contrast to findings in other parts of the world.(37)  
47  
48 However, we hypothesize that in the context of Chinese cities, these two characteristics may be  
49  
50 proxies for added family or job-related stress resulting from marriage and higher education,  
51  
52 especially when controlling for unemployment and for proxies of social cohesion at a neighborhood  
53  
54 level. Being married was also found to be an individual risk factor for any disorder in an earlier  
55  
56 analysis using WMH data in Beijing and Shanghai only (16) (being “never married” was  
57  
58  
59  
60

1  
2  
3 significantly protective against any past-year disorder). The relationship between marital status and  
4  
5 mental disorder also depends on the timing of each condition (37) as well as severity and type of  
6  
7 disorder,(16) which could be focuses for future papers using urban Chinese data, but were not our  
8  
9 focus here.  
10

11  
12  
13  
14 Mental disorders are a growing public health problem in China and the government has recently  
15  
16 taken steps to address the problem by creating hundreds of new psychiatric hospitals and integrating  
17  
18 its resources with existing community health systems.(27) A few recent sociodemographic changes  
19  
20 such as the increasing globalization of its economy and the end of the one-child policy may also  
21  
22 significantly improve neighborhood characteristics. However, more progress will likely be needed to  
23  
24 develop broad social measures for enhancing social cohesion, participation, and support to help  
25  
26 manage the consequences of decades of under-diagnosed mental disorders.  
27  
28

29  
30  
31 The large and rapid urbanization process that China went through during the last few decades has  
32  
33 been recently replicated, on a much smaller scale, in other countries. While there are important early  
34  
35 benefits of urbanization, the frequently chaotic expansion of urban areas is associated with  
36  
37 community disruption and the worsening of health outcomes. A growing number of low-income  
38  
39 individuals now live in large urban areas that do not provide the social support and stability found in  
40  
41 smaller communities. Understanding the effects of neighborhood characteristics on mental disorders  
42  
43 in fast growing regions of the world can help to promote better neighborhood environments and  
44  
45 control the burden of mental disorders in emerging countries.  
46  
47

48  
49  
50 One direction for future research would be to further investigate the role of migration. A high  
51  
52 proportion of individuals in our sample and in urban China as a whole were born in rural areas.  
53  
54 Migrating from rural to urban areas is not only prevalent in China, but also likely to be associated  
55  
56 with both marital status and income in addition to mental health.(12) Investigators should continue  
57  
58  
59  
60

1  
2  
3 to study the relationships among important neighborhood-level indicators of health, including a  
4  
5 more specific measure of migration status at both an individual and neighborhood level. Finally,  
6  
7 another potentially fruitful direction for future research could be to investigate how the distribution  
8  
9 of mental disorders at the neighborhood-level acts as a potential predictor for individual disorder  
10  
11 outcomes, preferably in a longitudinal setting.  
12  
13  
14  
15  
16  
17  
18  
19  
20  
21  
22  
23  
24  
25  
26  
27  
28  
29  
30  
31  
32  
33  
34  
35  
36  
37  
38  
39  
40  
41  
42  
43  
44  
45  
46  
47  
48  
49  
50  
51  
52  
53  
54  
55  
56  
57  
58  
59  
60

For peer review only

**Contributors:**

Chiavegatto Filho ADP designed statistical analyses; conducted the literature review; performed preliminary analyses; and wrote the introduction, results, and discussion sections. Sampson L aided in the literature review and analyses; wrote the methods section; created tables; and critically edited all versions of the manuscript. Martins SS helped to design statistical analyses; participated in interpretation of results; and critically edited all versions of the manuscript. Yu S performed statistical analyses; created tables; and critically edited all versions of the manuscript. Huang Y carried out the Beijing data acquisition; participated in interpretation of results; and critically edited all versions of the manuscript. He Y carried out the Shanghai data acquisition; participated in interpretation of results; and critically edited all versions of the manuscript. Lee S coordinated data acquisition and critically edited all versions of the manuscript. Hu C carried out the Shenzhen data acquisition and critically edited all versions of the manuscript. Zaslavsky AM designed data analyses; provided statistical support; participated in interpretation of results; and critically edited all versions of the manuscript. Kessler RC conceptualized and coordinated the study; participated in interpretation of results; and critically edited all versions of the manuscript. Galea S conceptualized the analyses; formulated hypotheses; led the analytic team; and critically edited all versions of the manuscript. All authors approved the final version and stand behind all aspects of the work.

**Competing interests:** In the past three years, Dr. Kessler received support for his epidemiological studies from Sanofi Aventis; was a consultant for Johnson & Johnson Wellness and Prevention, Shire, Takeda; and served on an advisory board for the Johnson & Johnson Services Inc. Lake Nona Life Project. Kessler is a co-owner of DataStat, Inc., a market research firm that carries out healthcare research. Other authors have no financial or personal conflicts of interest to disclose.

1  
2  
3 **Funding/Support:** This study was carried out in conjunction with the World Health Organization  
4  
5 World Mental Health (WMH) Survey Initiative which is supported by the National Institute of  
6  
7 Mental Health (NIMH; R01 MH070884), the John D. and Catherine T. MacArthur Foundation, the  
8  
9 Pfizer Foundation, the US Public Health Service (R13-MH066849, R01- MH069864, and R01  
10  
11 DA016558), the Fogarty International Center (FIRCA R03-TW006481), the Pan American Health  
12  
13 Organization, Eli Lilly and Company, Ortho-McNeil Pharmaceutical, GlaxoSmithKline, and Bristol-  
14  
15 Myers Squibb. We thank the staff of the WMH Data Collection and Data Analysis Coordination  
16  
17 Centres for assistance with instrumentation, fieldwork, and consultation on data analysis. None of  
18  
19 the funders had any role in the design, analysis, interpretation of results, or preparation of this paper.  
20  
21 A complete list of all within-country and cross-national WMH publications can be found at  
22  
23 <http://www.hcp.med.harvard.edu/wmh/>. The Chinese World Mental Health Survey Initiative is  
24  
25 supported by the Pfizer Foundation. The Shenzhen Mental Health Survey is supported by the  
26  
27 Shenzhen Bureau of Health and the Shenzhen Bureau of Science, Technology, and Information. The  
28  
29 analyses were partially supported by the Fundação de Amparo à Pesquisa do Estado de São Paulo  
30  
31 (FAPESP, grant number: 14/05363-7).  
32  
33  
34  
35  
36  
37

38 **Patient consent:** Written, informed consent after a full description of the study was obtained from  
39  
40 all participants before conducting the surveys in accordance with the ethical standards laid down in  
41  
42 the 1964 Declaration of Helsinki and its later amendments. These consent procedures were approved  
43  
44 by the Institutional Review Boards of the Shenzhen Institute of Mental Health and the Research  
45  
46 Center for Contemporary China in Beijing.  
47  
48  
49  
50

51 **Data sharing statement:** Access to the cross-national World Mental Health (WMH) data is  
52  
53 governed by the organizations funding and responsible for survey data collection in each country.  
54  
55  
56  
57  
58  
59  
60

1  
2  
3 These organizations made data available to the WMH consortium through restricted data sharing  
4  
5 agreements that do not allow us to release the data to third parties.  
6  
7  
8  
9  
10  
11  
12  
13  
14  
15  
16  
17  
18  
19  
20  
21  
22  
23  
24  
25  
26  
27  
28  
29  
30  
31  
32  
33  
34  
35  
36  
37  
38  
39  
40  
41  
42  
43  
44  
45  
46  
47  
48  
49  
50  
51  
52  
53  
54  
55  
56  
57  
58  
59  
60

For peer review only

## REFERENCES

1. National Bureau of Statistics of China 2012 [Available from: <http://www.stats.gov.cn/english/statisticaldata/AnnualData/>].
2. Gong P, Liang S, Carlton EJ, Jiang Q, Wu J, Wang L, et al. Urbanisation and health in China. *Lancet* (London, England). 2012;379(9818):843-52.
3. Collins PY, Patel V, Joestl SS, March D, Insel TR, Daar AS. Grand challenges in global mental health: A consortium of researchers, advocates and clinicians announces here research priorities for improving the lives of people with mental illness around the world, and calls for urgent action and investment. *Nature*. 2011;475(7354):27-30.
4. Yang G, Wang Y, Zeng Y, Gao GF, Liang X, Zhou M, et al. Rapid health transition in China, 1990–2010: findings from the Global Burden of Disease Study 2010. *The Lancet*. 2013;381(9882):1987-2015.
5. Yu W, Chiu C. Growing Pains: Changes in Psychological Well-being in Urban China. *Social Indicators Research*. 2016;129(3):1349-82.
6. Phillips MR, Zhang J, Shi Q, Song Z, Ding Z, Pang S, et al. Prevalence, treatment, and associated disability of mental disorders in four provinces in China during 2001-05: an epidemiological survey. *Lancet* (London, England). 2009;373(9680):2041-53.
7. WHO. Closing the gap in a generation: Health equity through action on the social determinants of health. Geneva, Switzerland: 2008.
8. WHO. Discussion Paper Series on Social Determinants of Health. Geneva, Switzerland: 2010 Contract No.: December 26.
9. Piketty T. *Capital in the Twenty-First Century*. Cambridge, MA: Belknap Press; 2014.
10. Mair C, Diez Roux AV, Galea S. Are neighbourhood characteristics associated with depressive symptoms? A review of evidence. *Journal of epidemiology and community health*. 2008;62(11):940-6, 8 p following 6.

- 1  
2  
3 11. Muntaner C, Eaton WW, Miech R, O'Campo P. Socioeconomic Position and Major Mental  
4 Disorders. *Epidemiologic Reviews*. 2004;26(1):53-62.
- 5  
6  
7 12. Wen M, Fan J, Jin L, Wang G. Neighborhood effects on health among migrants and natives  
8 in Shanghai, China. *Health & Place*. 2010;16:452-60.
- 9  
10  
11 13. Signorello LB, Cohen SS, Williams DR, Munro HM, Hargreaves MK, Blot WJ.  
12 Socioeconomic status, race, and mortality: a prospective cohort study. *American journal of public*  
13 *health*. 2014;104(12):e98-e107.
- 14  
15  
16 14. Braveman P, Egerter S, Williams DR. The social determinants of health: coming of age.  
17 *Annual review of public health*. 2011;32:381-98.
- 18  
19  
20 15. Albor C, Uphoff EP, Stafford M, Ballas D, Wilkinson RG, Pickett KE. The effects of  
21 socioeconomic incongruity in the neighbourhood on social support, self-esteem and mental health in  
22 England. *Social science & medicine (1982)*. 2014;111:1-9.
- 23  
24  
25 16. Shen YC, Zhang MY, Huang YQ, He YL, Liu ZR, Cheng H, et al. Twelve-month  
26 prevalence, severity, and unmet need for treatment of mental disorders in metropolitan China.  
27 *Psychological medicine*. 2006;36(2):257-67.
- 28  
29  
30 17. Xu Q, Perkins DD, Chow JC. Sense of community, neighboring, and social capital as  
31 predictors of local political participation in China. *American journal of community psychology*.  
32 2010;45(3-4):259-71.
- 33  
34  
35 18. Hu C. The impact of migration and mental disorders on suicidal behaviors: an  
36 epidemiological survey among general population in Shenzhen, China. Submitted for the degree of  
37 Doctor of Philosophy in Social Work & Social Administration at the University of Hong Kong.  
38 2008.
- 39  
40  
41 19. Heeringa SG, Wells EJ, Hubbard F, Mneimneh ZN, Chiu WT, Sampson NA, et al. Sample  
42 designs and sampling procedures. In: Kessler RC, Üstün TB, editors. *The WHO World Mental*  
43 *Health Surveys: Global perspectives on the epidemiology of mental disorders*. New York, New  
44 York: Cambridge University Press; 2008. p. 14–32.
- 45  
46  
47  
48  
49  
50  
51  
52  
53  
54  
55  
56  
57  
58  
59  
60



- 1  
2  
3 20. Harkness J, Pennell BE, Villar A, Gebler N, Aguilar-Gaxiola S, Bilgen I. Translation  
4 procedures and translation assessment in the World Mental Health Survey Initiative. In: Kessler RC,  
5 Üstün TB, editors. The WHO World Mental Health Surveys: Global perspectives on the  
6 epidemiology of mental disorders. New York, New York: Cambridge University Press; 2008. p. 91–  
7 113.  
8  
9  
10  
11  
12  
13  
14 21. Kessler RC, Ustun TB. The World Mental Health (WMH) Survey Initiative Version of the  
15 World Health Organization (WHO) Composite International Diagnostic Interview (CIDI).  
16 International Journal of Methods in Psychiatric Research. 2004;13(2):93-121.  
17  
18  
19  
20  
21 22. Diagnostic and Statistical Manual of Mental Disorders: DSM-IV-TR. Fourth ed.  
22 Washington, DC.: American Psychiatric Association; 2000.  
23  
24  
25 23. First MB, Spitzer RL, Gibbon M, Williams JBW. Structured Clinical Interview for DSM-  
26 IV-TR Axis I Disorders, Research Version, Patient Edition (SCID-I/P). New York, New York:  
27 Biometrics Research, New York State Psychiatric Institute; 2002.  
28  
29  
30  
31 24. Haro JM, Arbabzadeh-Bouchez S, Brugha TS, de Girolamo G, Guyer ME, Jin R, et al.  
32 Concordance of the Composite International Diagnostic Interview Version 3.0 (CIDI 3.0) with  
33 standardized clinical assessments in the WHO World Mental Health surveys. International journal of  
34 methods in psychiatric research. 2006;15(4):167-80.  
35  
36  
37  
38  
39  
40 25. Sardadvar S. How migrant status affects health beyond socioeconomic status: Evidence  
41 from Austria. International Migration Review. 2015;49(4):843-77.  
42  
43  
44 26. Wang YP, Wang Y, Wu J. Housing migrant workers in rapidly urbanizing regions: A study  
45 of the Chinese model in Shenzhen. Housing Studies. 2010;25(1).  
46  
47  
48  
49 27. Xiang YT, Yu X, Sartorius N, Ungvari GS, Chiu HF. Mental health in China: challenges  
50 and progress. Lancet (London, England). 2012;380(9855):1715-6.  
51  
52  
53 28. Yan M. Experiences of Poverty and Shame in Urban China. In: Chase E, Bantebya-  
54 Kyomuhendo G, editors. Poverty and Shame: Global Experiences. Oxford, United Kingdom: Oxford  
55 University Press; 2014.  
56  
57  
58  
59  
60

- 1  
2  
3 29. Dohrenwend BP, Levav I, Shrout PE, Schwartz S, Naveh G, Link BG, et al. Socioeconomic  
4 status and psychiatric disorders: the causation-selection issue. *Science* (New York, NY).  
5 1992;255(5047):946-52.  
6  
7  
8  
9  
10 30. Sareen J, Afifi TO, McMillan KA, Asmundson GJ. Relationship between household income  
11 and mental disorders: findings from a population-based longitudinal study. *Archives of general*  
12 *psychiatry*. 2011;68(4):419-27.  
13  
14  
15  
16 31. Astell-Burt T, Mitchell R, Hartig T. The association between green space and mental health  
17 varies across the lifecourse. A longitudinal study. *Journal of epidemiology and community health*.  
18 2014.  
19  
20  
21  
22 32. Evans GW. The built environment and mental health. *Journal of urban health : bulletin of*  
23 *the New York Academy of Medicine*. 2003;80(4):536-55.  
24  
25  
26  
27 33. Rios R, Aiken LS, Zautra AJ. Neighborhood contexts and the mediating role of  
28 neighborhood social cohesion on health and psychological distress among Hispanic and non-  
29 Hispanic residents. *Annals of behavioral medicine : a publication of the Society of Behavioral*  
30 *Medicine*. 2012;43(1):50-61.  
31  
32  
33  
34  
35 34. Kessler RC, Berglund P, Demler O, Jin R, Merikangas KR, Walters EE. Lifetime  
36 prevalence and age-of-onset distributions of DSM-IV disorders in the National Comorbidity Survey  
37 Replication. *Archives of general psychiatry*. 2005;62(6):593-602.  
38  
39  
40  
41  
42 35. Ye M, Chen Y. The influence of domestic living arrangement and neighborhood identity on  
43 mental health among urban Chinese elders. *Aging & mental health*. 2014;18(1):40-50.  
44  
45  
46  
47 36. Hipp J. What is the "neighbourhood" in neighbourhood satisfaction? Comparing the effects  
48 of structural characteristics measured at the micro-neighbourhood and tract levels. *Urban studies*  
49 *(Edinburgh, Scotland)*. 2010;47(12):2517-536.  
50  
51  
52  
53 37. Breslau J, Miller E, Jin R, Andrade LH, Chatterji S, Medina-Mora ME, et al. Mental  
54 disorders, marriage, and divorce. In: Alonso J, Chatterji S, He Y, editors. *The Burden of Mental*  
55  
56  
57  
58  
59  
60

1  
2  
3  
4  
5  
6  
7  
8  
9  
10  
11  
12  
13  
14  
15  
16  
17  
18  
19  
20  
21  
22  
23  
24  
25  
26  
27  
28  
29  
30  
31  
32  
33  
34  
35  
36  
37  
38  
39  
40  
41  
42  
43  
44  
45  
46  
47  
48  
49  
50  
51  
52  
53  
54  
55  
56  
57  
58  
59  
60

Disorders: Global Perspectives from the WHO World Mental Health Surveys. Cambridge, United Kingdom: Cambridge University Press; 2013.

For peer review only

1  
2  
3 Supplemental Table 1. Logistic Multilevel, Multivariate Regression Models using a Jackknife Resampling Method  
4  
5 Predicting Any Lifetime Disorder Among 4,072 Urban China Residents<sup>a</sup>  
6  
7  
8

|                                                             | 95% CI |       | 95% CI |       | 95% CI |       | 95% CI |       | 95% CI |  |
|-------------------------------------------------------------|--------|-------|--------|-------|--------|-------|--------|-------|--------|--|
|                                                             | Odds   | Lower | Upper  | Odds  | Lower  | Upper | Odds   | Lower | Upper  |  |
|                                                             | ratio  | limit | limit  | ratio | limit  | limit | ratio  | limit | limit  |  |
| <i>Individual-level fixed</i>                               |        |       |        |       |        |       |        |       |        |  |
| <i>effects</i>                                              |        |       |        |       |        |       |        |       |        |  |
| Age 35-49                                                   | 0.72*  | 0.52  | 1.00   | 0.72* | 0.52   | 1.00  | 0.77   | 0.54  | 1.08   |  |
| Age 50+                                                     | 0.79   | 0.54  | 1.15   | 0.79  | 0.54   | 1.15  | 0.84   | 0.57  | 1.24   |  |
| Female                                                      | 0.78*  | 0.62  | 0.99   | 0.78* | 0.62   | 0.99  | 0.77*  | 0.61  | 0.98   |  |
| Middle tertile of ratio of individual income to city income | 0.89   | 0.66  | 1.21   | 0.89  | 0.65   | 1.20  | 0.87   | 0.64  | 1.19   |  |
| Top tertile of ratio of individual income to city income    | 1.15   | 0.87  | 1.53   | 1.15  | 0.86   | 1.54  | 1.13   | 0.85  | 1.49   |  |
| In top 50% of country-level education                       | 1.25*  | 1.03  | 1.53   | 1.25* | 1.03   | 1.53  | 1.25*  | 1.02  | 1.52   |  |
| Married                                                     | 0.95   | 0.70  | 1.29   | 0.96  | 0.71   | 1.30  | 1.01   | 0.74  | 1.39   |  |
| Migrant to megacity                                         | 1.08   | 0.79  | 1.48   | 1.07  | 0.78   | 1.47  | 1.04   | 0.75  | 1.43   |  |
| Unemployed                                                  | 1.84   | 0.88  | 3.84   | 1.86  | 0.88   | 3.92  | 1.95   | 0.92  | 4.13   |  |
| <i>Neighborhood-level fixed</i>                             |        |       |        |       |        |       |        |       |        |  |
| <i>effects</i>                                              |        |       |        |       |        |       |        |       |        |  |
| Middle tertile of ratio of                                  |        |       |        | 1.16  | 0.86   | 1.56  |        |       |        |  |

|    |                          |      |      |       |      |
|----|--------------------------|------|------|-------|------|
| 1  |                          |      |      |       |      |
| 2  |                          |      |      |       |      |
| 3  | neighborhood income to   |      |      |       |      |
| 4  |                          |      |      |       |      |
| 5  | city income              |      |      |       |      |
| 6  |                          |      |      |       |      |
| 7  | Top tertile of ratio of  |      |      |       |      |
| 8  |                          |      |      |       |      |
| 9  |                          |      |      |       |      |
| 10 | neighborhood income to   | 1.00 | 0.77 | 1.31  |      |
| 11 |                          |      |      |       |      |
| 12 | city income              |      |      |       |      |
| 13 |                          |      |      |       |      |
| 14 | Middle tertile of %      |      |      |       |      |
| 15 |                          |      |      | 0.70* | 0.51 |
| 16 | married                  |      |      |       | 0.94 |
| 17 |                          |      |      |       |      |
| 18 | Top tertile of % married |      |      | 0.63* | 0.47 |
| 19 |                          |      |      |       | 0.85 |

20  
21 \* = P < 0.05

22  
23 Models include the above variables as well as fixed effects for city and for having a missing value on individual  
24  
25 employment, as well as a random intercept

For peer review only

26  
27  
28  
29  
30  
31  
32  
33  
34  
35  
36  
37  
38  
39  
40  
41  
42  
43  
44  
45  
46  
47  
48  
49  
50  
51  
52  
53  
54  
55  
56  
57  
58  
59  
60

1  
2  
3  
4  
5  
6  
7  
8  
9  
10  
11  
12  
13  
14  
15  
16  
17  
18  
19  
20  
21  
22  
23  
24  
25  
26  
27  
28  
29  
30  
31  
32  
33  
34  
35  
36  
37  
38  
39  
40  
41  
42  
43  
44  
45  
46  
47  
48  
49  
50  
51  
52  
53  
54  
55  
56  
57  
58  
59  
60

Supplemental Table 2. Logistic Multilevel, Multivariate Regression Models using a Jackknife Resampling Method  
Predicting Any Past-Year Disorder Among 4,072 Urban China Residents <sup>a</sup>

|                                                             |       | 95% CI | 95% CI |       | 95% CI | 95% CI |       | 95% CI | 95% CI |
|-------------------------------------------------------------|-------|--------|--------|-------|--------|--------|-------|--------|--------|
|                                                             | Odds  | Lower  | Upper  | Odds  | Lower  | Upper  | Odds  | Lower  | Upper  |
|                                                             | ratio | limit  | limit  | ratio | limit  | limit  | ratio | limit  | limit  |
| <i>Individual-level fixed effects</i>                       |       |        |        |       |        |        |       |        |        |
| Age 35-49                                                   | 0.58* | 0.40   | 0.86   | 0.58* | 0.40   | 0.85   | 0.63* | 0.42   | 0.93   |
| Age 50+                                                     | 0.63* | 0.40   | 0.99   | 0.63* | 0.40   | 0.99   | 0.68  | 0.43   | 1.09   |
| Female                                                      | 0.87  | 0.65   | 1.18   | 0.87  | 0.65   | 1.18   | 0.86  | 0.64   | 1.16   |
| Middle tertile of ratio of individual income to city income | 0.95  | 0.66   | 1.36   | 0.95  | 0.66   | 1.37   | 0.92  | 0.64   | 1.33   |
| Top tertile of ratio of individual income to city income    | 1.07  | 0.76   | 1.51   | 1.10  | 0.77   | 1.58   | 1.04  | 0.73   | 1.47   |
| In top 50% of country-level education                       | 1.46* | 1.07   | 1.99   | 1.48* | 1.08   | 2.02   | 1.45* | 1.06   | 1.99   |
| Married                                                     | 1.11  | 0.78   | 1.57   | 1.12  | 0.79   | 1.59   | 1.19  | 0.82   | 1.71   |
| Migrant to megacity                                         | 1.09  | 0.75   | 1.57   | 1.07  | 0.74   | 1.55   | 1.04  | 0.71   | 1.50   |
| Unemployed                                                  | 2.68* | 1.33   | 5.40   | 2.72* | 1.35   | 5.50   | 2.89* | 1.45   | 5.79   |
| <i>Neighborhood-level fixed effects</i>                     |       |        |        |       |        |        |       |        |        |
| Middle tertile of ratio of neighborhood                     |       |        |        | 1.21  | 0.85   | 1.73   |       |        |        |

|    |                         |      |       |      |      |
|----|-------------------------|------|-------|------|------|
| 1  |                         |      |       |      |      |
| 2  |                         |      |       |      |      |
| 3  | income to city income   |      |       |      |      |
| 4  |                         |      |       |      |      |
| 5  | Top tertile of ratio of |      |       |      |      |
| 6  |                         |      |       |      |      |
| 7  | neighborhood income     | 0.85 | 0.64  | 1.15 |      |
| 8  |                         |      |       |      |      |
| 9  | to city income          |      |       |      |      |
| 10 |                         |      |       |      |      |
| 11 | Middle tertile of %     |      |       |      |      |
| 12 |                         |      |       |      |      |
| 13 | married                 |      | 0.77  | 0.53 | 1.10 |
| 14 |                         |      |       |      |      |
| 15 | Top tertile of %        |      |       |      |      |
| 16 |                         |      |       |      |      |
| 17 | married                 |      | 0.57* | 0.40 | 0.83 |
| 18 |                         |      |       |      |      |
| 19 |                         |      |       |      |      |

\* = P < 0.05

Models include the above variables as well as fixed effects for city and for having a missing value on individual employment, as well as a random intercept

For peer review only

1  
2  
3Supplemental Table 3. Logistic Multilevel, Multivariate Mixed Regression Models using a Jackknife Resampling  
4  
5Method Predicting Any Past-Year Disorder Among Those With Lifetime Disorder Prior to Past Year (n = 1,022)<sup>a</sup>  
6  
7

|                                                             | 95%    |       |       |        |       |       |        |       |       |
|-------------------------------------------------------------|--------|-------|-------|--------|-------|-------|--------|-------|-------|
|                                                             | 95% CI |       |       | 95% CI |       |       | 95% CI |       |       |
|                                                             | Odds   | Lower | Upper | Odds   | Lower | Upper | Odds   | Lower | Upper |
|                                                             | ratio  | limit | limit | ratio  | limit | limit | ratio  | limit | limit |
| <i>Individual-level fixed</i>                               |        |       |       |        |       |       |        |       |       |
| <i>effects</i>                                              |        |       |       |        |       |       |        |       |       |
| Age 35-49                                                   | 0.45*  | 0.26  | 0.80  | 0.44*  | 0.25  | 0.77  | 0.50*  | 0.27  | 0.90  |
| Age 50+                                                     | 0.44*  | 0.23  | 0.87  | 0.44*  | 0.22  | 0.88  | 0.47*  | 0.23  | 0.95  |
| Female                                                      | 1.26   | 0.84  | 1.89  | 1.32   | 0.88  | 1.97  | 1.27   | 0.84  | 1.90  |
| Middle tertile of ratio of individual income to city income | 0.98   | 0.59  | 1.61  | 1.01   | 0.61  | 1.67  | 0.94   | 0.57  | 1.55  |
| Top tertile of ratio of individual income to city income    | 0.68   | 0.40  | 1.16  | 0.76   | 0.45  | 1.31  | 0.66   | 0.39  | 1.12  |
| In top 50% of country-level education                       | 1.32   | 0.78  | 2.25  | 1.36   | 0.80  | 2.32  | 1.32   | 0.78  | 2.23  |
| Married                                                     | 1.64*  | 1.04  | 2.58  | 1.61*  | 1.02  | 2.55  | 1.72*  | 1.08  | 2.74  |
| Migrant to megacity                                         | 0.87   | 0.53  | 1.42  | 0.83   | 0.51  | 1.35  | 0.89   | 0.55  | 1.43  |
| Unemployed                                                  | 2.61   | 0.31  | 21.79 | 2.69   | 0.34  | 21.37 | 2.77   | 0.37  | 20.86 |
| <i>Neighborhood-level fixed effects</i>                     |        |       |       |        |       |       |        |       |       |
| Middle tertile of ratio of                                  |        |       |       | 1.15   | 0.78  | 1.69  |        |       |       |



|    |                          |       |      |      |
|----|--------------------------|-------|------|------|
| 1  |                          |       |      |      |
| 2  |                          |       |      |      |
| 3  | neighborhood income to   |       |      |      |
| 4  |                          |       |      |      |
| 5  | city income              |       |      |      |
| 6  |                          |       |      |      |
| 7  | Top tertile of ratio of  |       |      |      |
| 8  |                          |       |      |      |
| 9  |                          |       |      |      |
| 10 | neighborhood income to   | 0.60* | 0.38 | 0.94 |
| 11 |                          |       |      |      |
| 12 | city income              |       |      |      |
| 13 |                          |       |      |      |
| 14 | Middle tertile of %      |       |      |      |
| 15 |                          |       | 1.00 | 0.65 |
| 16 | married                  |       |      | 1.53 |
| 17 |                          |       |      |      |
| 18 | Top tertile of % married |       | 0.67 | 0.40 |
| 19 |                          |       |      | 1.11 |

\* = P < 0.05

Models include the above variables as well as fixed effects for city and for having a missing value on individual employment, as well as a random intercept

For peer review only

1  
2  
3 Supplemental Table 4. Multivariate Logistic Regression Models Predicting Any Lifetime Disorder Among 4,072  
4  
5 Urban China Residents, using Proc SurveyLogistic<sup>a</sup>  
6

|                                                             | 95% CI |       | 95% CI |       | 95% CI |       | 95% CI |       | 95% CI |  |
|-------------------------------------------------------------|--------|-------|--------|-------|--------|-------|--------|-------|--------|--|
|                                                             | Odds   | Lower | Upper  | Odds  | Lower  | Upper | Odds   | Lower | Upper  |  |
|                                                             | ratio  | limit | limit  | ratio | limit  | limit | ratio  | limit | limit  |  |
| <i>Individual-level fixed</i>                               |        |       |        |       |        |       |        |       |        |  |
| <i>effects</i>                                              |        |       |        |       |        |       |        |       |        |  |
| Age 35-49                                                   | 0.72   | 0.52  | 1.01   | 0.72* | 0.52   | 1.00  | 0.78   | 0.57  | 1.09   |  |
| Age 50+                                                     | 0.81   | 0.54  | 1.21   | 0.81  | 0.53   | 1.21  | 0.88   | 0.58  | 1.32   |  |
| Female                                                      | 0.80   | 0.64  | 1.01   | 0.80  | 0.63   | 1.02  | 0.79*  | 0.62  | 1.00   |  |
| Middle tertile of ratio of individual income to city income | 0.86   | 0.63  | 1.17   | 0.86  | 0.64   | 1.17  | 0.85   | 0.62  | 1.15   |  |
| Top tertile of ratio of individual income to city income    | 1.14   | 0.86  | 1.50   | 1.15  | 0.86   | 1.55  | 1.11   | 0.84  | 1.47   |  |
| In top 50% of country-level education                       | 1.33*  | 1.09  | 1.61   | 1.33* | 1.09   | 1.63  | 1.29*  | 1.06  | 1.58   |  |
| Married                                                     | 0.96   | 0.71  | 1.28   | 0.97  | 0.72   | 1.31  | 1.04   | 0.76  | 1.43   |  |
| Migrant to megacity                                         | 1.01   | 0.72  | 1.42   | 1.00  | 0.71   | 1.41  | 0.97   | 0.68  | 1.37   |  |
| Unemployed                                                  | 1.89   | 0.97  | 3.70   | 1.92  | 0.97   | 3.80  | 2.07*  | 1.06  | 4.04   |  |
| <i>Neighborhood-level fixed</i>                             |        |       |        |       |        |       |        |       |        |  |
| <i>effects</i>                                              |        |       |        |       |        |       |        |       |        |  |
| Middle tertile of ratio of neighborhood income to           |        |       |        | 1.14  | 0.80   | 1.63  |        |       |        |  |

|    |                          |      |       |      |      |
|----|--------------------------|------|-------|------|------|
| 1  |                          |      |       |      |      |
| 2  |                          |      |       |      |      |
| 3  | city income              |      |       |      |      |
| 4  |                          |      |       |      |      |
| 5  | Top tertile of ratio of  |      |       |      |      |
| 6  |                          |      |       |      |      |
| 7  |                          |      |       |      |      |
| 8  | neighborhood income to   | 0.95 | 0.70  | 1.30 |      |
| 9  |                          |      |       |      |      |
| 10 | city income              |      |       |      |      |
| 11 |                          |      |       |      |      |
| 12 | Middle tertile of %      |      |       |      |      |
| 13 |                          |      |       |      |      |
| 14 | married                  |      | 0.70  | 0.48 | 1.02 |
| 15 |                          |      |       |      |      |
| 16 | Top tertile of % married |      | 0.61* | 0.43 | 0.87 |
| 17 |                          |      |       |      |      |

18  
19 \* = P < 0.05

20  
21 Models include the above variables as well as controls for city and missing values on individual unemployment

22  
23  
24  
25  
26  
27  
28  
29  
30  
31  
32  
33  
34  
35  
36  
37  
38  
39  
40  
41  
42  
43  
44  
45  
46  
47  
48  
49  
50  
51  
52  
53  
54  
55  
56  
57  
58  
59  
60

1  
2  
3  
4  
5  
6  
7  
8  
9  
10  
11  
12  
13  
14  
15  
16  
17  
18  
19  
20  
21  
22  
23  
24  
25  
26  
27  
28  
29  
30  
31  
32  
33  
34  
35  
36  
37  
38  
39  
40  
41  
42  
43  
44  
45  
46  
47  
48  
49  
50  
51  
52  
53  
54  
55  
56  
57  
58  
59  
60

Supplemental Table 5. Multivariate Logistic Regression Models Predicting Any Past-Year Disorder Among 4,072

Urban China Residents, using Proc SurveyLogistic<sup>a</sup>

|                                                             | 95% CI |       | 95% CI |       | 95% CI |       | 95% CI |       | 95% CI |  |
|-------------------------------------------------------------|--------|-------|--------|-------|--------|-------|--------|-------|--------|--|
|                                                             | Odds   | Lower | Upper  | Odds  | Lower  | Upper | Odds   | Lower | Upper  |  |
|                                                             | ratio  | limit | limit  | ratio | limit  | limit | ratio  | limit | limit  |  |
| <i>Individual-level fixed effects</i>                       |        |       |        |       |        |       |        |       |        |  |
| Age 35-49                                                   | 0.57*  | 0.39  | 0.85   | 0.57* | 0.39   | 0.85  | 0.64*  | 0.44  | 0.93   |  |
| Age 50+                                                     | 0.62   | 0.38  | 1.02   | 0.62  | 0.38   | 1.02  | 0.70   | 0.42  | 1.15   |  |
| Female                                                      | 0.91   | 0.69  | 1.19   | 0.90  | 0.68   | 1.20  | 0.88   | 0.67  | 1.17   |  |
| Middle tertile of ratio of individual income to city income | 0.90   | 0.62  | 1.29   | 0.92  | 0.64   | 1.34  | 0.87   | 0.60  | 1.26   |  |
| Top tertile of ratio of individual income to city income    | 1.04   | 0.74  | 1.46   | 1.11  | 0.78   | 1.59  | 1.00   | 0.71  | 1.41   |  |
| In top 50% of country-level education                       | 1.51*  | 1.13  | 2.02   | 1.56* | 1.16   | 2.09  | 1.48*  | 1.10  | 1.98   |  |
| Married                                                     | 1.09   | 0.78  | 1.54   | 1.11  | 0.78   | 1.59  | 1.22   | 0.83  | 1.78   |  |
| Migrant to megacity                                         | 1.03   | 0.70  | 1.51   | 1.00  | 0.68   | 1.48  | 0.98   | 0.66  | 1.45   |  |
| Unemployed                                                  | 2.67*  | 1.27  | 5.60   | 2.72* | 1.30   | 5.70  | 3.02*  | 1.48  | 6.14   |  |
| <i>Neighborhood-level fixed effects</i>                     |        |       |        |       |        |       |        |       |        |  |
| Middle tertile of ratio of neighborhood                     |        |       |        | 1.13  | 0.75   | 1.71  |        |       |        |  |

|    |                         |      |      |       |      |
|----|-------------------------|------|------|-------|------|
| 1  |                         |      |      |       |      |
| 2  |                         |      |      |       |      |
| 3  | income to city income   |      |      |       |      |
| 4  |                         |      |      |       |      |
| 5  | Top tertile of ratio of |      |      |       |      |
| 6  |                         |      |      |       |      |
| 7  | neighborhood income     | 0.78 | 0.56 | 1.07  |      |
| 8  |                         |      |      |       |      |
| 9  | to city income          |      |      |       |      |
| 10 |                         |      |      |       |      |
| 11 | Middle tertile of %     |      |      |       |      |
| 12 |                         |      |      |       |      |
| 13 | married                 |      |      | 0.77  | 0.50 |
| 14 |                         |      |      |       | 1.19 |
| 15 | Top tertile of %        |      |      |       |      |
| 16 |                         |      |      |       |      |
| 17 | married                 |      |      | 0.53* | 0.35 |
| 18 |                         |      |      |       | 0.81 |
| 19 |                         |      |      |       |      |

\* = P < 0.05

Models include the above variables as well as controls for city and missing values on individual unemployment

status

For peer review only

1  
2  
3Supplemental Table 6. Multivariate Logistic Regression Models Predicting Any Past-Year Disorder, Among Those  
4  
5With Lifetime Disorder Prior to Past Year (n = 1,022) using Proc SurveyLogistic <sup>a</sup>  
6

|                                                             | 95%    |       |       |        |       |       |        |       |       |
|-------------------------------------------------------------|--------|-------|-------|--------|-------|-------|--------|-------|-------|
|                                                             | 95% CI |       |       | 95% CI |       |       | 95% CI |       |       |
|                                                             | Odds   | Lower | Upper | Odds   | Lower | Upper | Odds   | Lower | Upper |
|                                                             | ratio  | limit | limit | ratio  | limit | limit | ratio  | limit | limit |
| <i>Individual-level fixed</i>                               |        |       |       |        |       |       |        |       |       |
| <i>effects</i>                                              |        |       |       |        |       |       |        |       |       |
| Age 35-49                                                   | 0.48*  | 0.25  | 0.91  | 0.45*  | 0.24  | 0.87  | 0.53   | 0.28  | 1.01  |
| Age 50+                                                     | 0.44*  | 0.20  | 0.95  | 0.45*  | 0.20  | 0.98  | 0.48   | 0.22  | 1.07  |
| Female                                                      | 1.29   | 0.87  | 1.90  | 1.36   | 0.92  | 2.01  | 1.30   | 0.88  | 1.92  |
| Middle tertile of ratio of individual income to city income | 1.03   | 0.61  | 1.73  | 1.06   | 0.63  | 1.78  | 0.96   | 0.58  | 1.60  |
| Top tertile of ratio of individual income to city income    | 0.66   | 0.36  | 1.20  | 0.76   | 0.44  | 1.33  | 0.64   | 0.36  | 1.12  |
| In top 50% of country-level education                       | 1.28   | 0.75  | 2.18  | 1.33   | 0.76  | 2.32  | 1.28   | 0.75  | 2.18  |
| Married                                                     | 1.60   | 0.96  | 2.68  | 1.59   | 0.95  | 2.64  | 1.73*  | 1.06  | 2.82  |
| Migrant to megacity                                         | 0.94   | 0.57  | 1.54  | 0.86   | 0.53  | 1.42  | 0.95   | 0.60  | 1.50  |
| Unemployed                                                  | 2.75   | 0.54  | 14.06 | 2.80   | 0.59  | 13.21 | 2.88   | 0.67  | 12.41 |
| <i>Neighborhood-level fixed effects</i>                     |        |       |       |        |       |       |        |       |       |
| Middle tertile of ratio of                                  |        |       |       | 1.12   | 0.72  | 1.75  |        |       |       |

|    |                          |       |      |      |
|----|--------------------------|-------|------|------|
| 1  |                          |       |      |      |
| 2  |                          |       |      |      |
| 3  | neighborhood income to   |       |      |      |
| 4  |                          |       |      |      |
| 5  | city income              |       |      |      |
| 6  |                          |       |      |      |
| 7  | Top tertile of ratio of  |       |      |      |
| 8  |                          |       |      |      |
| 9  |                          |       |      |      |
| 10 | neighborhood income to   | 0.58* | 0.36 | 0.92 |
| 11 |                          |       |      |      |
| 12 | city income              |       |      |      |
| 13 |                          |       |      |      |
| 14 | Middle tertile of %      |       |      |      |
| 15 |                          |       | 1.00 | 0.64 |
| 16 | married                  |       |      | 1.55 |
| 17 |                          |       |      |      |
| 18 | Top tertile of % married |       | 0.61 | 0.36 |
| 19 |                          |       |      | 1.04 |

20  
\* = P < 0.05

21  
22  
23 Models include the above variables as well as controls for city and missing values on individual unemployment

24  
25 status

26  
27  
28  
29  
30  
31  
32  
33  
34  
35  
36  
37  
38  
39  
40  
41  
42  
43  
44  
45  
46  
47  
48  
49  
50  
51  
52  
53  
54  
55  
56  
57  
58  
59  
60

For peer review only

STROBE 2007 (v4) Statement—Checklist of items that should be included in reports of *cross-sectional studies*

| Section/Topic                | Item # | Recommendation                                                                                                                                                                       | Reported on page # |
|------------------------------|--------|--------------------------------------------------------------------------------------------------------------------------------------------------------------------------------------|--------------------|
| Title and abstract           | 1      | (a) Indicate the study's design with a commonly used term in the title or the abstract                                                                                               | 1                  |
|                              |        | (b) Provide in the abstract an informative and balanced summary of what was done and what was found                                                                                  | 3                  |
| <b>Introduction</b>          |        |                                                                                                                                                                                      |                    |
| Background/rationale         | 2      | Explain the scientific background and rationale for the investigation being reported                                                                                                 | 5-6                |
| Objectives                   | 3      | State specific objectives, including any prespecified hypotheses                                                                                                                     | 6                  |
| <b>Methods</b>               |        |                                                                                                                                                                                      |                    |
| Study design                 | 4      | Present key elements of study design early in the paper                                                                                                                              | 6-8                |
| Setting                      | 5      | Describe the setting, locations, and relevant dates, including periods of recruitment, exposure, follow-up, and data collection                                                      | 6                  |
| Participants                 | 6      | (a) Give the eligibility criteria, and the sources and methods of selection of participants                                                                                          | 6-9                |
| Variables                    | 7      | Clearly define all outcomes, exposures, predictors, potential confounders, and effect modifiers. Give diagnostic criteria, if applicable                                             | 9-10               |
| Data sources/<br>measurement | 8*     | For each variable of interest, give sources of data and details of methods of assessment (measurement). Describe comparability of assessment methods if there is more than one group | 9-10               |
| Bias                         | 9      | Describe any efforts to address potential sources of bias                                                                                                                            | 8-9                |
| Study size                   | 10     | Explain how the study size was arrived at                                                                                                                                            | 8                  |
| Quantitative variables       | 11     | Explain how quantitative variables were handled in the analyses. If applicable, describe which groupings were chosen and why                                                         | 9-10               |
| Statistical methods          | 12     | (a) Describe all statistical methods, including those used to control for confounding                                                                                                | 9-11               |
|                              |        | (b) Describe any methods used to examine subgroups and interactions                                                                                                                  | 10-11              |
|                              |        | (c) Explain how missing data were addressed                                                                                                                                          | 8                  |
|                              |        | (d) If applicable, describe analytical methods taking account of sampling strategy                                                                                                   | 8, 10-11           |
|                              |        | (e) Describe any sensitivity analyses                                                                                                                                                | 11                 |
| <b>Results</b>               |        |                                                                                                                                                                                      |                    |



|                          |     |                                                                                                                                                                                                              |             |
|--------------------------|-----|--------------------------------------------------------------------------------------------------------------------------------------------------------------------------------------------------------------|-------------|
| Participants             | 13* | (a) Report numbers of individuals at each stage of study—eg numbers potentially eligible, examined for eligibility, confirmed eligible, included in the study, completing follow-up, and analysed            | 8           |
|                          |     | (b) Give reasons for non-participation at each stage                                                                                                                                                         | 8           |
|                          |     | (c) Consider use of a flow diagram                                                                                                                                                                           |             |
| Descriptive data         | 14* | (a) Give characteristics of study participants (eg demographic, clinical, social) and information on exposures and potential confounders                                                                     | 14          |
|                          |     | (b) Indicate number of participants with missing data for each variable of interest                                                                                                                          | 8           |
| Outcome data             | 15* | Report numbers of outcome events or summary measures                                                                                                                                                         | 11          |
| Main results             | 16  | (a) Give unadjusted estimates and, if applicable, confounder-adjusted estimates and their precision (eg, 95% confidence interval). Make clear which confounders were adjusted for and why they were included | 9-10, 14-21 |
|                          |     | (b) Report category boundaries when continuous variables were categorized                                                                                                                                    |             |
|                          |     | (c) If relevant, consider translating estimates of relative risk into absolute risk for a meaningful time period                                                                                             |             |
| Other analyses           | 17  | Report other analyses done—eg analyses of subgroups and interactions, and sensitivity analyses                                                                                                               | 19-21       |
| <b>Discussion</b>        |     |                                                                                                                                                                                                              |             |
| Key results              | 18  | Summarise key results with reference to study objectives                                                                                                                                                     | 21          |
| Limitations              | 19  | Discuss limitations of the study, taking into account sources of potential bias or imprecision. Discuss both direction and magnitude of any potential bias                                                   | 21-22       |
| Interpretation           | 20  | Give a cautious overall interpretation of results considering objectives, limitations, multiplicity of analyses, results from similar studies, and other relevant evidence                                   | 22-24       |
| Generalisability         | 21  | Discuss the generalisability (external validity) of the study results                                                                                                                                        | 21-22       |
| <b>Other information</b> |     |                                                                                                                                                                                                              |             |
| Funding                  | 22  | Give the source of funding and the role of the funders for the present study and, if applicable, for the original study on which the present article is based                                                | 27          |

\*Give information separately for cases and controls in case-control studies and, if applicable, for exposed and unexposed groups in cohort and cross-sectional studies.

**Note:** An Explanation and Elaboration article discusses each checklist item and gives methodological background and published examples of transparent reporting. The STROBE checklist is best used in conjunction with this article (freely available on the Web sites of PLoS Medicine at <http://www.plosmedicine.org/>, Annals of Internal Medicine at <http://www.annals.org/>, and Epidemiology at <http://www.epidem.com/>). Information on the STROBE Initiative is available at [www.strobe-statement.org](http://www.strobe-statement.org).

# BMJ Open

## Neighborhood characteristics and mental disorders in three Chinese cities: Multilevel models from the World Mental Health Surveys

|                                 |                                                                                                                                                                                                                                                                                                                                                                                                                                                                                                                                                                                                                                                                                                                                                                                                                                                                                                                                                        |
|---------------------------------|--------------------------------------------------------------------------------------------------------------------------------------------------------------------------------------------------------------------------------------------------------------------------------------------------------------------------------------------------------------------------------------------------------------------------------------------------------------------------------------------------------------------------------------------------------------------------------------------------------------------------------------------------------------------------------------------------------------------------------------------------------------------------------------------------------------------------------------------------------------------------------------------------------------------------------------------------------|
| Journal:                        | <i>BMJ Open</i>                                                                                                                                                                                                                                                                                                                                                                                                                                                                                                                                                                                                                                                                                                                                                                                                                                                                                                                                        |
| Manuscript ID                   | bmjopen-2017-017679.R1                                                                                                                                                                                                                                                                                                                                                                                                                                                                                                                                                                                                                                                                                                                                                                                                                                                                                                                                 |
| Article Type:                   | Research                                                                                                                                                                                                                                                                                                                                                                                                                                                                                                                                                                                                                                                                                                                                                                                                                                                                                                                                               |
| Date Submitted by the Author:   | 17-Aug-2017                                                                                                                                                                                                                                                                                                                                                                                                                                                                                                                                                                                                                                                                                                                                                                                                                                                                                                                                            |
| Complete List of Authors:       | Chiavegatto Filho, Alexandre; School of Public Health of the University of Sao Paulo, Epidemiology<br>Sampson, Laura; Boston University School of Public Health, Epidemiology<br>Martins, Silvia; Columbia University Mailman School of Public Health, Epidemiology<br>Yu, Shui; Boston University School of Public Health, Epidemiology<br>Huang, Yueqin; Peking University Sixth Hospital, Institute of Mental Health<br>He, Yanling; Shanghai Mental Health Center, Shanghai Jiao Tong University School of Medicine, Department of Psychiatric Epidemiology and Department of Psychiatry<br>Lee, S; Chinese University of Hong Kong, Department of Psychiatry<br>Hu, Chiyi; Shenzhen Institute of Mental Health<br>Zaslavsk, Alan; Harvard Medical School, Department of Health Care Policy<br>Kessler, Ronald; Harvard Medical School, Department of Health Care Policy<br>Galea, Sandro; Boston University School of Public Health, Epidemiology |
| <b>Primary Subject Heading</b>: | Global health                                                                                                                                                                                                                                                                                                                                                                                                                                                                                                                                                                                                                                                                                                                                                                                                                                                                                                                                          |
| Secondary Subject Heading:      | Mental health, Epidemiology, Public health, Research methods, Sociology                                                                                                                                                                                                                                                                                                                                                                                                                                                                                                                                                                                                                                                                                                                                                                                                                                                                                |
| Keywords:                       | Anxiety disorders < PSYCHIATRY, Depression & mood disorders < PSYCHIATRY, Substance misuse < PSYCHIATRY, Impulse control disorders < PSYCHIATRY, EPIDEMIOLOGY, STATISTICS & RESEARCH METHODS                                                                                                                                                                                                                                                                                                                                                                                                                                                                                                                                                                                                                                                                                                                                                           |
|                                 |                                                                                                                                                                                                                                                                                                                                                                                                                                                                                                                                                                                                                                                                                                                                                                                                                                                                                                                                                        |

SCHOLARONE™  
Manuscripts

1  
2  
3 Neighborhood characteristics and mental disorders in three Chinese cities: Multilevel models from  
4  
5 the World Mental Health Surveys  
6  
7  
8

9 Chiavegatto Filho ADP, PhD<sup>1</sup>, Sampson L, BA<sup>2</sup>, Martins SS, MD, PhD<sup>3</sup>, Yu S, MA<sup>2</sup>, Huang Y,  
10 PhD<sup>4</sup>, He Y, MD<sup>5</sup>, Lee S, MBBS<sup>6</sup>, Hu C, MD, PhD<sup>7</sup>, Zaslavsky A, PhD<sup>8</sup>, Kessler RC, PhD<sup>8</sup>, Galea  
11  
12  
13 S, MD, DrPH<sup>2,3</sup>  
14  
15  
16  
17

18 <sup>1</sup>School of Public Health of the University of Sao Paulo, Department of Epidemiology, 715 Av Dr  
19 Arnaldo, Sao Paulo, SP, Brazil 01246-904  
20  
21

22 <sup>2</sup>Boston University School of Public Health, Department of Epidemiology, 715 Albany Street,  
23 Boston, MA, U.S.A. 02118  
24  
25  
26

27 <sup>3</sup>Columbia University Mailman School of Public Health, Department of Epidemiology, 722 West  
28 168<sup>th</sup> Street, New York, NY, U.S.A. 10032  
29  
30

31 <sup>4</sup>Institute of Mental Health/The Sixth Hospital, Peking University. 51 Hua Yuan Bei Road. Haidian  
32 District, Beijing, P. R. China 100191  
33  
34  
35

36 <sup>5</sup>Shanghai Mental Health Center, Shanghai Jiao Tong University School of Medicine, Department of  
37 Psychiatric Epidemiology and Department of Psychiatry, 600 Wan Ping Nan Lu, Shanghai, P. R.  
38 China 200030  
39  
40  
41

42 <sup>6</sup>The Chinese University of Hong Kong, Department of Psychiatry, G/F Multicentre, □Tai Po  
43 Hospital, □Tai Po, Hong Kong, P. R. China.  
44  
45

46 <sup>7</sup>Shenzhen Institute of Mental Health and Shenzhen Kangning Hospital, No.1080, Cuizhu Road,  
47 Luohu District, Shenzhen, Guangdong Province, P. R. China.  
48  
49

50 <sup>8</sup>Harvard University Medical School, Department of Health Care Policy, 180A Longwood Avenue,  
51 Boston, MA, U.S.A. 02115  
52  
53  
54  
55  
56  
57  
58  
59  
60

1  
2  
3 All correspondence should be directed to Sandro Galea, MD, Boston University School of Public  
4  
5 Health, Department of Epidemiology, 715 Albany Street, T301, Boston, MA, U.S.A. 02115.  
6  
7 Telephone: 617-638-4644. Email: [Sgalea@bu.edu](mailto:Sgalea@bu.edu)  
8  
9

10  
11  
12 **Word count:** 4,157  
13  
14  
15  
16  
17  
18  
19  
20  
21  
22  
23  
24  
25  
26  
27  
28  
29  
30  
31  
32  
33  
34  
35  
36  
37  
38  
39  
40  
41  
42  
43  
44  
45  
46  
47  
48  
49  
50  
51  
52  
53  
54  
55  
56  
57  
58  
59  
60

For peer review only

**ABSTRACT**

**Objectives:** The rapid growth of urban areas in China in the past few decades has introduced profound changes in family structure and income distribution that could plausibly affect mental health. Although multilevel studies of the influence of area-level socioeconomic factors on mental health have become more common in other parts of the world, a study of this sort has not been carried out in Chinese cities. Our objectives were to examine the associations of two key neighborhood-level variables—median income and percentage of married individuals living in the neighborhood—with mental disorders net of individual-level income and marital status in three Chinese cities.

**Setting:** Household interviews in Beijing, Shanghai, and Shenzhen, PRC, as part of the cross-sectional World Mental Health Surveys.

**Participants:** 4,072 men and women aged 18-88.

**Primary and secondary outcome measures:** Lifetime and past-year internalizing and externalizing mental disorders.

**Results:** Each one-point increase in neighborhood-level percent of married residents was associated with a 1% lower odds of lifetime ( $p = .024$ ) and 2% lower odds of past-year ( $p = .008$ ) individual-level externalizing disorder, net of individual-level marital status. When split into tertiles, individuals living in neighborhoods in the top tertile of percent of married residents had 54% lower odds of a past-year externalizing disorder (OR=0.46, 95% CI: 0.24-0.87) compared to those in the bottom tertile. Neighborhood-level marital status was not statistically associated with either lifetime or past-year internalizing disorders. Neighborhood-level income was not statistically associated with odds of either internalizing or externalizing disorders.

**Conclusions:** The proportion of married residents in respondents' neighborhoods was significantly inversely associated with having externalizing mental disorders in this sample of Chinese cities. Possible mechanisms for this finding are discussed and related to social causation, social selection, and social control theories. Future work should examine these relationships longitudinally.

1  
2  
3  
4  
5 **Keywords:** Anxiety disorders, depression & mood disorders, substance misuse, impulse control  
6  
7 disorders, epidemiology, statistics & research methods  
8  
9

## 10 11 12 **STRENGTHS AND LIMITATIONS OF THIS STUDY**

### 13 14 **Strengths of this study:**

- 15  
16 • We are the first to our knowledge to investigate the association of neighborhood  
17 characteristics with mental disorders in large urban areas of China
- 18  
19 • We completed various sensitivity analyses including different types of regression models in  
20 order to account for both the complex survey design and the multilevel nature of the our  
21 data, as well as different ways of operationalizing the exposure variables, and found that our  
22 results were robust across different methods and models
- 23  
24 • We applied statistical weights to our analyses in order to ensure that our sample was  
25 representative of the demographics in the included cities  
26  
27  
28  
29  
30  
31  
32  
33

### 34 **Limitations of this study:**

- 35  
36 • The cross-sectional design does not allow us to examine temporality of our exposures and  
37 outcomes
- 38  
39 • The data were collected from 2002-2007; these cities are likely to have changed  
40 demographically in the decade since data collection and therefore our results may not be as  
41 generalizable to today's population  
42  
43  
44  
45  
46  
47  
48  
49  
50  
51  
52  
53  
54  
55  
56  
57  
58  
59  
60

## INTRODUCTION

China, the world's most populous country, has recently experienced one of the largest internal migration processes in human history; the proportion of the population living in urban areas increased from about 36% in 2000 to 50% in 2011.(1, 2) Mental disorders are an important concern in urban areas with rapid and unequal growth.(3) Despite important early gains in personal well being, recent studies have suggested that the negative effects of rapid urbanization on the mental health of Chinese residents may have now caught up with the potential benefits of economic growth.(4, 5) Results from the Global Burden of Disease Study found that mental disorders accounted for seven of the top 20 causes of years living with a disability (YLD) in China, with all disorders increasing in absolute terms from 1990 to 2010.(4) It is estimated that around 173 million Chinese adults have a mental disorder, 158 million of who have never received any professional treatment.(6)

Based on this literature, it is becoming increasingly important to characterize the risk and protective factors for mental disorders in urban China. Individual factors such as demographics and socioeconomic position have long been known to be associated with mental disorders in urban areas worldwide, but neighborhood characteristics are a growing area of concern, especially in rapidly developing countries.(7, 8) Neighborhoods are responsible for the conditions in which people are born, grow, live, and age; neighborhood-level characteristics may represent both an important driver of mental health and an opportunity for prevention.(9)

Extant work has shown that neighborhood characteristics such as economic disadvantage, social interactions, and income inequality are associated with depression and other mental disorders in urban areas.(10-12)

1  
2  
3 While research has examined the association between neighborhood factors and physical health in  
4 Shanghai,(13) no previous analyses to our knowledge have assessed associations of neighborhood-  
5 level factors with mental health in Chinese cities. Further, we expect there to be differences in the  
6 neighborhood-level explanatory factors for different types of mental disorders, as there are at the  
7 individual level in this population.(14) As a way of categorizing different outcomes, internalizing  
8 disorders are defined as those whose symptoms are typically expressed inwardly, such as anxiety  
9 and depression, whereas externalizing disorders are those that present outwardly with behavior, such  
10 as intermittent explosive disorder or alcohol abuse.(15)

11  
12  
13  
14  
15  
16  
17  
18  
19  
20  
21  
22  
23 The association of internalizing and internalizing disorders with neighborhood factors has been  
24 previously described in other contexts. A study of African American adolescents in the United  
25 States, for example, found that higher neighborhood poverty and unemployment levels predicted the  
26 presence of internalizing symptoms via lower social support.(16) On the other hand, a study of  
27 Mexican American youth found that while the interaction of neighborhood disadvantage with child  
28 generation predicted the presence of stressful life events, neighborhood disadvantage as a main  
29 effect was not associated with internalizing or externalizing symptoms.(17) However, this type of  
30 study has not been conducted, to our knowledge, in the adult population of urban China.

31  
32  
33  
34  
35  
36  
37  
38  
39  
40  
41  
42 To better understand the potential role of neighborhood factors in determining mental health in this  
43 context, we analyzed epidemiological survey data collected in three of the largest urban areas in  
44 China: Beijing, Shanghai, and Shenzhen. We focused on two neighborhood-level contextual  
45 variables that we hypothesized to be associated with prevalence of mental disorders: neighborhood-  
46 level income and percent of neighborhood residents who are married.

47  
48  
49  
50  
51  
52  
53  
54  
55 The focus on income is based on abundant evidence that group-level income is associated with  
56 health indicators in other countries, even when taking into account individual income.(18, 19)



1  
2  
3 Neighborhood-level income could be associated with availability of salutary resources that would  
4  
5 otherwise not be present in particular neighborhoods.(20, 21) Further, neighborhood-level income  
6  
7 may be associated with strong pro-social forces such as social cohesion that are themselves linked to  
8  
9 better health.(22, 23)  
10

11  
12  
13  
14 The focus on marriage was motivated by a previous study in China which found that being  
15  
16 unmarried was associated with higher odds of having a mood disorder as well as with the severity of  
17  
18 such disorders,(14) possibly a manifestation of the importance of family-oriented life in Chinese  
19  
20 culture. In addition, reports of the importance of family arrangements in overall community life in  
21  
22 China, such as in social interactions and political participation,(24) suggest that neighborhood-level  
23  
24 family relations could plausibly have an effect on mental disorders after accounting for individual  
25  
26 marital and relationship status.  
27  
28  
29  
30

## 31 **METHODS**

### 32 **Sample**

33  
34  
35 Our sample was comprised of residents aged 18-88 in the cities of Beijing, Shanghai, and Shenzhen  
36  
37 who participated in the World Mental Health (WMH) Survey Initiative (Table 1). The Beijing and  
38  
39 Shanghai surveys were carried out in 2002-2003 and the Shenzhen survey in 2006-2007. The  
40  
41 samples in all three cities were based on a multi-stage area clustered household survey design,  
42  
43 described in detail elsewhere.(14, 25, 26)  
44  
45  
46  
47  
48  
49  
50  
51  
52  
53  
54  
55  
56  
57  
58  
59  
60

**Table 1.** WMH Sample Characteristics by City

| City                  | Survey <sup>a</sup> | Sample characteristics                                                                  | Field dates | Age range | Sample size |         | Response rate <sup>b</sup> |
|-----------------------|---------------------|-----------------------------------------------------------------------------------------|-------------|-----------|-------------|---------|----------------------------|
|                       |                     |                                                                                         |             |           | Part I      | Part II |                            |
| Beijing /<br>Shanghai | B-WMH /<br>S-WMH    | Beijing and Shanghai metropolitan areas                                                 | 2002-3      | 18-70     | 5,201       | 1,628   | 74.7                       |
| Shenzhen              | Shenzhen            | Shenzhen metropolitan area; included temporary residents as well as household residents | 2006-7      | 18-88     | 7,134       | 2,476   | 80.0                       |
| <b>TOTAL</b>          |                     |                                                                                         |             |           | (12,335)    | (4,104) | 77.7                       |

<sup>a</sup> B-WMH (The Beijing World Mental Health Survey); S-WMH (The Shanghai World Mental Health Survey)

<sup>b</sup> The response rate is calculated as the ratio of the number of households in which an interview was completed to the number of households originally sampled, excluding from the denominator households known not to be eligible either because of being vacant at the time of initial contact or because the residents were unable to speak the designated languages of the survey. The weighted average response rate is 77.7%.

Neighborhoods in this sample consisted of neighborhood committees (NCs), the official, local community organizations in urban China that consist of 100-700 households, and that were also used as the primary sampling unit in the WMH study in China.(14) These neighborhoods represent the areas of China in which respondents currently lived at the time of the survey. In Shenzhen, work units (e.g., schools or companies) were also used as primary sampling units in addition to NCs, in order to capture temporary residents living in the city for at least one year. After combining Beijing,

1  
2  
3 Shanghai, and Shenzhen and including both NCs and work units under the definition of  
4  
5 neighborhood for this study, our sample consisted of 143 total neighborhoods.  
6  
7

8  
9  
10 All participants completed Part I of the survey, which assessed core disorders and demographics,  
11  
12 while a probability subsample consisting of all respondents who met lifetime criteria for any Part I  
13  
14 disorder plus a probability subsample of 25% of other Part I respondents completed Part II (n = 914  
15  
16 in Beijing; n = 714 in Shanghai; and n = 2,476 in Shenzhen; Table 1). The sample was weighted to  
17  
18 adjust for differential sampling of Part I respondents into Part II; for differential probability of  
19  
20 selection within households (one respondent selected for interview in each household regardless of  
21  
22 household size, creating an inverse association between number of household residents and  
23  
24 probability of selection); and to match socio-demographic distributions in the respective cities.(26)  
25  
26 The weighted Part II sample represents the distribution of mental disorders and marital status in the  
27  
28 entire sample without bias, and adjusts the sample for minor discrepancies from the population on  
29  
30 the distributions of age, sex, and marital status.  
31  
32

33  
34  
35  
36 The analyses reported in this paper are based on the weighted Part II sample, with the exception of  
37  
38 32 respondents (0.2% of the weighted Part II sample) who refused to answer or answered “don’t  
39  
40 know” on a key covariate, resulting in a final analytic sample of 4,072 respondents.  
41  
42

#### 43 44 **Data collection**

45  
46 WMH interviews were administered face-to-face in the homes of respondents by trained lay  
47  
48 interviewers. The WMH interview schedule was translated using a standardized World Health  
49  
50 Organization (WHO) translation, back-translation, and harmonization protocol.(27) Written,  
51  
52 informed consent after a full description of the study was obtained from all participants before  
53  
54 conducting the surveys. These consent procedures were approved by the Institutional Review  
55  
56  
57  
58  
59  
60

Boards of the Shenzhen Institute of Mental Health and the Research Center for Contemporary China in Beijing.

## Measures

### *Primary outcome: Mental disorders*

Mental disorders were assessed with the WHO Composite International Diagnostic Interview (CIDI) Version 3.0.(28) The disorders assessed included internalizing disorders (posttraumatic stress disorder, panic disorder, specific phobia, social phobia, agoraphobia, adult separation anxiety, generalized anxiety disorder, major depressive disorder, dysthymic disorder and bipolar/sub-threshold bipolar disorders), and externalizing disorders (intermittent explosive disorder and alcohol and drug abuse with or without dependence). Diagnoses were based on the definitions and criteria of the American Psychiatric Association's Diagnostic and Statistical Manual of Mental Disorders, Fourth Edition (DSM IV).(29) Both lifetime and past-year diagnoses were assessed. Clinical calibration studies carried out in a number of WMH countries confirmed good concordance of DSM-IV diagnoses based on the CIDI with diagnoses based on blinded clinical reappraisal interviews using the Structured Clinical Interview for DSM-IV (SCID).(30, 31)

### *Individual-level fixed effects*

Individual-level covariates chosen for this analysis included age (categorized into 35-49, 50-64 and 65+ vs. 18-34), sex (female vs. not), marital status (currently married vs. not), employment status (currently unemployed vs. not unemployed vs. “don’t know” or refused to answer), migrant status (migrant to the current city vs. not, where migrant was defined as not “raised mostly in a large city”), income, and education. For income, individual per-capita income was first calculated as the combined income of all family members divided by the number of family members. The ratio of each respondent’s individual per-capita income to the median city-level income was then calculated using each city’s full sample (including both Parts I and II). Finally, this variable was centered so

1  
2  
3 that the mean was equal to 0, and used as the continuous individual income exposure variable.

4  
5 Individual education was categorized as being above vs. below the median of country-level  
6  
7 education.  
8  
9

### 10 11 *Neighborhood-level fixed effects*

12  
13 We divided the median income in each neighborhood (using each city's full sample, both Parts I and  
14  
15 II) by the city-level median to calculate relative neighborhood-level income. The neighborhood-  
16  
17 level marital status variable was calculated as the weighted proportion of married individuals in each  
18  
19 neighborhood, again using the full sample in all cities. Both of these continuous variables were then  
20  
21 centered so that the means were equal to 0, and used as the main neighborhood-level fixed effects.  
22  
23 Each of these variables was also split into tertiles to classify each neighborhood as high,  
24  
25 intermediate, or low on these measures and used as categorical fixed effects for an additional  
26  
27 sensitivity analysis.  
28  
29  
30  
31  
32

### 33 **Data Analysis**

34  
35 Data analyses were carried out using SAS version 9.4. We used SAS survey procedures to calculate  
36  
37 valid design-based standard errors for frequencies and means. Regression models were first run with  
38  
39 a random intercept varying at the neighborhood level as the only independent variable in order to  
40  
41 calculate the intraclass correlation coefficient, which estimates the proportion of variation in the  
42  
43 disorder outcomes that can be attributed to the neighborhood.(32)  
44  
45  
46  
47

48  
49 Weighted, multilevel, multivariate logistic regression models were then run using Proc Glimmix  
50  
51 with neighborhood as the repeated subject and both lifetime and past-year internalizing and  
52  
53 externalizing disorders as the outcomes. Zero G tests were run in order to test for the random effect  
54  
55 of the intercept in each model.(32)  
56  
57  
58  
59  
60

1  
2  
3 As a sensitivity analyses, we also ran multilevel models using a jackknife resampling method for  
4 estimation of variance and SAS Surveylogistic regressions, and found very similar results across all  
5 three methods, suggesting robust findings (tables available on request).  
6  
7  
8  
9  
10

## 11 12 13 **RESULTS**

### 14 **Prevalence of mental disorders (outcome)**

15  
16 Ten percent of the weighted analytic sample met criteria for lifetime history of any internalizing  
17 disorder, while 4.7% met criteria for lifetime history of any externalizing disorder (Table 2). Six  
18 percent had past-year internalizing disorder, and 2.7% had past-year externalizing disorder.  
19  
20  
21  
22  
23  
24  
25  
26  
27  
28  
29  
30  
31  
32  
33  
34  
35  
36  
37  
38  
39  
40  
41  
42  
43  
44  
45  
46  
47  
48  
49  
50  
51  
52  
53  
54  
55  
56  
57  
58  
59  
60

**Table 2.** Prevalence and Means of Independent and Dependent Variables Among 4,072 Urban China Residents

|                                              | Unweighted<br>n | Weighted % | Weighted<br>mean | Weighted design-<br>based SE <sup>a</sup> |
|----------------------------------------------|-----------------|------------|------------------|-------------------------------------------|
| <i>Cities</i>                                |                 |            |                  |                                           |
| Beijing                                      | 914             | 22.31%     | -                | 1.38%                                     |
| Shanghai                                     | 713             | 17.43%     | -                | 0.90%                                     |
| Shenzhen                                     | 2445            | 60.26%     | -                | 1.34%                                     |
| <i>Individual-level variables</i>            |                 |            |                  |                                           |
| Age 18-34                                    | 2046            | 61.96%     | -                | 0.95%                                     |
| Age 35-49                                    | 1353            | 24.11%     | -                | 0.84%                                     |
| Age 50-64                                    | 473             | 8.97%      | -                | 0.60%                                     |
| Age 65+                                      | 200             | 4.96%      | -                | 0.50%                                     |
| Female                                       | 2014            | 49.26%     | -                | 1.19%                                     |
| Male                                         | 2058            | 50.74%     | -                | 1.19%                                     |
| Ratio of individual income to city<br>income | -               | -          | 1.63             | 0.05                                      |
| In bottom 50% of country-level<br>education  | 1302            | 35.70%     | -                | 1.18%                                     |
| In top 50% of country-level<br>education     | 2770            | 64.30%     | -                | 1.18%                                     |
| Currently married                            | 2695            | 59.04%     | -                | 1.05%                                     |
| Not currently married                        | 1377            | 40.96%     | -                | 1.05%                                     |
| Migrant to megacity                          | 2526            | 63.89%     | -                | 1.18%                                     |

|                                                  |      |        |        |       |
|--------------------------------------------------|------|--------|--------|-------|
| Not a migrant to megacity                        | 1546 | 36.11% | -      | 1.18% |
| Unemployed                                       | 163  | 3.21%  | -      | 0.45% |
| Not unemployed                                   | 3909 | 96.79% | -      | 0.45% |
| <i>Mental disorders</i>                          |      |        |        |       |
| Any lifetime internalizing disorder <sup>b</sup> | 885  | 9.82%  | -      | 0.57% |
| Any past-year internalizing disorder             | 559  | 6.31%  | -      | 0.47% |
| Any lifetime externalizing disorder <sup>c</sup> | 368  | 4.67%  | -      | 0.46% |
| Any past-year externalizing disorder             | 230  | 2.66%  | -      | 0.27% |
| <i>Neighborhood-level variables</i>              |      |        |        |       |
| Ratio of neighborhood income to city income      | -    | -      | 1.05   | 0.01  |
| Percent married in neighborhood                  | -    | -      | 61.69% | 0.36  |

<sup>a</sup> SE = Standard error

<sup>b</sup> Internalizing disorders include anxiety (posttraumatic stress disorder, panic disorder, specific phobia, social phobia, agoraphobia, adult separation anxiety, generalized anxiety disorder) and mood (major depressive disorder, dysthymic disorder and bipolar/sub-threshold bipolar) disorders

<sup>c</sup> Externalizing disorders include behavioral (intermittent explosive disorder) and substance use (alcohol and drug abuse with or without dependence) disorders

### Distributions of independent variables

About half (49.3%) of respondents were female; the majority was younger than 35 years old (62.0%); 59.0% were married; 63.9% were migrants to a large city; and 3.2% were unemployed.

The mean ratio of individual income to median city income was 1.63.

The mean ratio of neighborhood median income to city median income was 1.05. The mean percentage of married individuals in each neighborhood was 61.7%.



### **Random-intercept only models**

The intraclass correlation coefficients for variation at the neighborhood level were calculated from random-intercept-only models (not shown in tables) to be 0.04 and 0.16 for any lifetime internalizing and externalizing disorder respectively, and 0.07 and 0.09 for any past-year internalizing and externalizing disorder respectively. In other words, neighborhoods explained the greatest proportion of variation of the outcome (16%) in the model for history of lifetime externalizing disorder.

### **Lifetime mental disorder models**

Table 3 reports multivariate logistic regressions with individual-level variables only (first column), neighborhood-level income as the main independent variable of interest (second column), and neighborhood-level percentage of married individuals as the main independent variable of interest (third column) with any lifetime internalizing disorder as the outcome. The associations between the individual-level variables and this outcome were modest; the only statistically significant association was found was between higher individual income (OR: 1.05, 95% CI: 1.02-1.09 for all three models) and lifetime internalizing disorder.

Table 3. Logistic Multilevel, Multivariate Regression Models with Lifetime Internalizing Disorder<sup>a</sup>  
as the Outcome Among 4,072 Urban China Residents<sup>b</sup>

|                                                | Individual-level exposures<br>only |                          |                          | Individual-level exposures<br>and neighborhood-level<br>income |                          |                          | Individual-level exposures<br>and neighborhood-level<br>marital status |                          |                          |
|------------------------------------------------|------------------------------------|--------------------------|--------------------------|----------------------------------------------------------------|--------------------------|--------------------------|------------------------------------------------------------------------|--------------------------|--------------------------|
|                                                | Odds<br>ratio                      | 95% CI<br>Lower<br>limit | 95% CI<br>Upper<br>limit | Odds<br>ratio                                                  | 95% CI<br>Lower<br>limit | 95% CI<br>Upper<br>limit | Odds<br>ratio                                                          | 95% CI<br>Lower<br>limit | 95% CI<br>Upper<br>limit |
| <i>Individual-level fixed effects</i>          |                                    |                          |                          |                                                                |                          |                          |                                                                        |                          |                          |
| Age 35-49                                      | 0.75                               | 0.55                     | 1.01                     | 0.75                                                           | 0.56                     | 1.02                     | 0.77                                                                   | 0.57                     | 1.05                     |
| Age 50-64                                      | 1.35                               | 0.87                     | 2.09                     | 1.36                                                           | 0.88                     | 2.10                     | 1.40                                                                   | 0.91                     | 2.17                     |
| Age 65+                                        | 0.90                               | 0.53                     | 1.53                     | 0.90                                                           | 0.53                     | 1.53                     | 0.93                                                                   | 0.55                     | 1.58                     |
| Female                                         | 1.19                               | 0.92                     | 1.53                     | 1.19                                                           | 0.92                     | 1.53                     | 1.18                                                                   | 0.92                     | 1.53                     |
| Ratio of individual<br>income to city income   | 1.05*                              | 1.02                     | 1.09                     | 1.05*                                                          | 1.02                     | 1.09                     | 1.05*                                                                  | 1.02                     | 1.09                     |
| In top 50% of country-<br>level education      | 1.28                               | 0.97                     | 1.69                     | 1.26                                                           | 0.95                     | 1.69                     | 1.27                                                                   | 0.96                     | 1.68                     |
| Married                                        | 0.75                               | 0.56                     | 1.02                     | 0.75                                                           | 0.56                     | 1.02                     | 0.79                                                                   | 0.57                     | 1.09                     |
| Migrant to megacity                            | 1.11                               | 0.77                     | 1.60                     | 1.11                                                           | 0.77                     | 1.61                     | 1.09                                                                   | 0.75                     | 1.57                     |
| Unemployed                                     | 1.49                               | 0.77                     | 2.89                     | 1.50                                                           | 0.78                     | 2.91                     | 1.57                                                                   | 0.80                     | 3.06                     |
| <i>Neighborhood-level fixed effects</i>        |                                    |                          |                          |                                                                |                          |                          |                                                                        |                          |                          |
| Ratio of neighborhood<br>income to city income |                                    |                          |                          | 1.07                                                           | 0.82                     | 1.40                     |                                                                        |                          |                          |

|                                 |                   |                           |         |                   |                           |         |                   |                           |         |
|---------------------------------|-------------------|---------------------------|---------|-------------------|---------------------------|---------|-------------------|---------------------------|---------|
| Percent married in neighborhood |                   |                           |         |                   |                           |         | 0.99              | 0.99                      | 1.00    |
| <i>Random effects</i>           | Variance estimate | Zero G<br>test chi square | p-value | Variance estimate | Zero G<br>test chi square | p-value | Variance estimate | Zero G<br>test chi square | p-value |
| Intercept                       | 0.07              | 2.35                      | .063    | 0.07              | 2.28                      | .065    | 0.06              | 1.60                      | .103    |

\* =  $P < 0.05$

<sup>a</sup> Internalizing disorders include anxiety (posttraumatic stress disorder, panic disorder, specific phobia, social phobia, agoraphobia, adult separation anxiety, generalized anxiety disorder) and mood (major depressive disorder, dysthymic disorder and bipolar/sub-threshold bipolar) disorders

<sup>b</sup> Models include the above variables as well as fixed effects for city and for having a missing (“don’t know” or refused) value on individual unemployment

Neither neighborhood-level income nor neighborhood-level marital status was statistically significantly associated with lifetime internalizing disorder. Additionally, the random effect of the intercept was not statistically significant in the fully adjusted models (p-values ranged from .063-.103).

Table 4 presents the same three models as in Table 3, but with lifetime externalizing disorder as the outcome. In these models, being of older age (OR’s ranged from 0.41-0.43 for age 50-64 compared to age 18-34) and being female (OR’s: 0.24-0.25) were both significantly protective against externalizing disorder, while being married (OR’s: 1.75-1.96) was significantly positively associated with externalizing disorder.

Table 4. Logistic Multilevel, Multivariate Regression Models with Lifetime Externalizing Disorder <sup>a</sup> as the Outcome Among 4,072 Urban China Residents <sup>b</sup>

|                                             | Individual-level exposures only |                    |                    | Individual-level exposures and neighborhood-level income |                    |                    | Individual-level exposures and neighborhood-level marital status |                    |                    |
|---------------------------------------------|---------------------------------|--------------------|--------------------|----------------------------------------------------------|--------------------|--------------------|------------------------------------------------------------------|--------------------|--------------------|
|                                             | Odds ratio                      | 95% CI Lower limit | 95% CI Upper limit | Odds ratio                                               | 95% CI Lower limit | 95% CI Upper limit | Odds ratio                                                       | 95% CI Lower limit | 95% CI Upper limit |
| <i>Individual-level fixed effects</i>       |                                 |                    |                    |                                                          |                    |                    |                                                                  |                    |                    |
| Age 35-49                                   | 0.74                            | 0.46               | 1.19               | 0.74                                                     | 0.46               | 1.20               | 0.78                                                             | 0.48               | 1.27               |
| Age 50-64                                   | 0.41*                           | 0.18               | 0.93               | 0.41*                                                    | 0.18               | 0.93               | 0.43*                                                            | 0.18               | 0.98               |
| Age 65+                                     | 0.24                            | 0.05               | 1.22               | 0.24                                                     | 0.05               | 1.22               | 0.24                                                             | 0.05               | 1.30               |
| Female                                      | 0.25*                           | 0.17               | 0.36               | 0.25*                                                    | 0.17               | 0.36               | 0.24*                                                            | 0.17               | 0.35               |
| Ratio of individual income to city income   | 1.03                            | 0.99               | 1.08               | 1.03                                                     | 0.99               | 1.07               | 1.03                                                             | 0.98               | 1.07               |
| In top 50% of country-level education       | 1.41                            | 0.91               | 2.20               | 1.39                                                     | 0.89               | 2.19               | 1.39                                                             | 0.90               | 2.15               |
| Married                                     | 1.76*                           | 1.04               | 2.96               | 1.75*                                                    | 1.03               | 3.97               | 1.96*                                                            | 1.13               | 3.40               |
| Migrant to megacity                         | 1.10                            | 0.76               | 1.60               | 1.10                                                     | 0.76               | 1.59               | 1.07                                                             | 0.73               | 1.57               |
| Unemployed                                  | 2.30                            | 0.92               | 5.77               | 2.31                                                     | 0.92               | 5.82               | 2.49                                                             | 0.98               | 6.33               |
| <i>Neighborhood-level fixed effects</i>     |                                 |                    |                    |                                                          |                    |                    |                                                                  |                    |                    |
| Ratio of neighborhood income to city income |                                 |                    |                    | 1.10                                                     | 0.77               | 1.56               |                                                                  |                    |                    |

|                                 |                   |                        |         |                   |                        |         |                   |                        |         |
|---------------------------------|-------------------|------------------------|---------|-------------------|------------------------|---------|-------------------|------------------------|---------|
| Percent married in neighborhood |                   |                        |         |                   |                        |         | 0.99*             | 0.97                   | 1.00    |
| <i>Random effects</i>           | Variance estimate | Zero G test chi square | p-value | Variance estimate | Zero G test chi square | p-value | Variance estimate | Zero G test chi square | p-value |
| Intercept                       | 0.31              | 15.86*                 | <.0001  | 0.32              | 16.02*                 | <.0001  | 0.27              | 13.34*                 | <.0001  |

\* =  $P < 0.05$

<sup>a</sup> Externalizing disorders include behavioral (intermittent explosive disorder) and substance use (alcohol and drug abuse with or without dependence) disorders

<sup>b</sup> Models include the above variables as well as fixed effects for city and for having a missing (“don’t know” or refused) value on individual unemployment

For the neighborhood-level exposures, higher neighborhood-level income was not statistically significant in its association (second column), but neighborhood-level percentage of married individuals (third column) was statistically associated with lower odds of lifetime externalizing disorder (OR: 0.99, 95% CI: 0.97-1.00). In other words, each one-point increase in neighborhood-level percent of married residents was associated with a 1% decreased odds of lifetime externalizing disorder.

As an alternative interpretation, when the sample was split into tertiles in order to use a categorical variable for percent married (not shown in tables), we found that living in a neighborhood in the top tertile of the percent married residents in each neighborhood was associated with a 51% decreased odds of lifetime externalizing disorder (OR: 0.49, 95% CI: 0.27-0.89), and being in the middle tertile was associated with a 50% decreased odds of lifetime externalizing disorder (OR: 0.50, 95% CI: 0.28-0.89), both compared to the bottom tertile.

1  
2  
3 Finally, the bottom row of Table 4 shows that the random effect of an intercept varying at the  
4 neighborhood level was statistically significant in all three models ( $p < .0001$ ), further illustrating  
5 that the probability of having history of externalizing disorder varied by neighborhood.  
6  
7  
8  
9

### 10 11 **Past-year mental disorder models**

12  
13 Models for past-year internalizing disorders are presented on Table 5, with the same independent  
14 variables included as in Tables 3 and 4. There were no statistically significant associations among  
15 individual-level variables with past-year internalizing disorders in the fully adjusted models, with  
16 the exception of being 35 to 49 years old, which was associated with lower odds of past-year  
17 internalizing disorder in comparison with younger individuals for each model (OR's: 0.66-0.69).  
18  
19  
20  
21  
22  
23  
24  
25  
26  
27  
28  
29  
30  
31  
32  
33  
34  
35  
36  
37  
38  
39  
40  
41  
42  
43  
44  
45  
46  
47  
48  
49  
50  
51  
52  
53  
54  
55  
56  
57  
58  
59  
60

Table 5. Logistic Multilevel, Regression Multivariate Models with Past-Year Internalizing Disorder

<sup>a</sup> as the Outcome Among 4,072 Urban China Residents <sup>b</sup>

|                                             | Individual-level exposures only |                    |                    | Individual-level exposures and neighborhood-level income |                    |                    | Individual-level exposures and neighborhood-level marital status |                    |                    |
|---------------------------------------------|---------------------------------|--------------------|--------------------|----------------------------------------------------------|--------------------|--------------------|------------------------------------------------------------------|--------------------|--------------------|
|                                             | Odds ratio                      | 95% CI Lower limit | 95% CI Upper limit | Odds ratio                                               | 95% CI Lower limit | 95% CI Upper limit | Odds ratio                                                       | 95% CI Lower limit | 95% CI Upper limit |
| <i>Individual-level fixed effects</i>       |                                 |                    |                    |                                                          |                    |                    |                                                                  |                    |                    |
| Age 35-49                                   | 0.66*                           | 0.44               | 0.98               | 0.66*                                                    | 0.44               | 0.98               | 0.69                                                             | 0.47               | 1.03               |
| Age 50-64                                   | 1.27                            | 0.73               | 2.19               | 1.27                                                     | 0.73               | 2.19               | 1.34                                                             | 0.77               | 2.32               |
| Age 65+                                     | 0.59                            | 0.28               | 1.23               | 0.59                                                     | 0.28               | 1.23               | 0.61                                                             | 0.29               | 1.29               |
| Female                                      | 1.17                            | 0.83               | 1.65               | 1.17                                                     | 0.83               | 1.65               | 1.16                                                             | 0.82               | 1.63               |
| Ratio of individual income to city income   | 1.04                            | 0.99               | 1.08               | 1.04                                                     | 1.00               | 1.08               | 1.03                                                             | 0.99               | 1.08               |
| In top 50% of country-level education       | 1.44                            | 0.97               | 2.13               | 1.44                                                     | 0.96               | 2.17               | 1.42                                                             | 0.96               | 2.10               |
| Married                                     | 0.83                            | 0.56               | 1.23               | 0.83                                                     | 0.56               | 1.23               | 0.88                                                             | 0.58               | 1.35               |
| Migrant to megacity                         | 1.33                            | 0.81               | 2.16               | 1.32                                                     | 0.81               | 2.15               | 1.29                                                             | 0.78               | 2.11               |
| Unemployed                                  | 1.44                            | 0.87               | 2.37               | 1.43                                                     | 0.87               | 2.36               | 1.54                                                             | 0.92               | 2.59               |
| <i>Neighborhood-level fixed effects</i>     |                                 |                    |                    |                                                          |                    |                    |                                                                  |                    |                    |
| Ratio of neighborhood income to city income |                                 |                    |                    | 0.97                                                     | 0.70               | 1.35               |                                                                  |                    |                    |

|                                 |                   |                        |         |                   |                        |         |                   |                        |         |
|---------------------------------|-------------------|------------------------|---------|-------------------|------------------------|---------|-------------------|------------------------|---------|
| Percent married in neighborhood |                   |                        |         |                   |                        |         | 0.99              | 0.99                   | 1.00    |
| <i>Random effects</i>           | Variance estimate | Zero G test chi square | p-value | Variance estimate | Zero G test chi square | p-value | Variance estimate | Zero G test chi square | p-value |
| Intercept                       | 0.15              | 5.99*                  | .007    | 0.15              | 5.88*                  | .008    | 0.13              | 4.18*                  | .021    |

\* =  $P < 0.05$

<sup>a</sup> Internalizing disorders include anxiety (posttraumatic stress disorder, panic disorder, specific phobia, social phobia, agoraphobia, adult separation anxiety, generalized anxiety disorder) and mood (major depressive disorder, dysthymic disorder and bipolar/sub-threshold bipolar) disorders

<sup>b</sup> Models include the above variables as well as fixed effects for city and for having a missing (“don’t know” or refused) value on individual unemployment

The second two columns in Table 5 show that again, there were no significant associations between neighborhood-level income or proportion of married residents with odds of internalizing disorder. However, the proportion of married residents per neighborhood neared statistical significance ( $p = .09$ ), and the random effect of the intercept varying at the neighborhood level was statistically significant in all three models ( $p$  values ranged from .021 to .007).

Table 6 presents the results for past-year externalizing disorder as the outcome. In these models, being of older age (OR’s: 0.05-0.53 for all age groups compared to being 18-34 years old) and being female (OR’s: 0.38-0.40) were again significantly protective against externalizing disorder, and being married (OR’s: 1.92-2.23) was again significantly positively associated with externalizing disorder. Additionally, being unemployed, having a higher educational attainment, and having a higher relative individual income were all statistically associated with higher odds of disorder (OR’s: 5.71-1.04).



Table 6. Logistic Multilevel, Multivariate Regression Models with Past-Year Externalizing Disorder

<sup>a</sup> as the Outcome Among 4,072 Urban China Residents <sup>b</sup>

|                                             | Individual-level exposures only |             |             | Individual-level exposures and neighborhood-level income |             |             | Individual-level exposures and neighborhood-level marital status |             |             |
|---------------------------------------------|---------------------------------|-------------|-------------|----------------------------------------------------------|-------------|-------------|------------------------------------------------------------------|-------------|-------------|
|                                             | 95% CI                          | 95% CI      |             | 95% CI                                                   | 95% CI      |             | 95% CI                                                           | 95% CI      |             |
|                                             | Odds ratio                      | Lower limit | Upper limit | Odds ratio                                               | Lower limit | Upper limit | Odds ratio                                                       | Lower limit | Upper limit |
| <i>Individual-level fixed effects</i>       |                                 |             |             |                                                          |             |             |                                                                  |             |             |
| Age 35-49                                   | 0.49*                           | 0.26        | 0.91        | 0.49*                                                    | 0.26        | 0.92        | 0.53*                                                            | 0.28        | 0.99        |
| Age 50-64                                   | 0.17*                           | 0.07        | 0.41        | 0.17*                                                    | 0.07        | 0.41        | 0.19*                                                            | 0.08        | 0.45        |
| Age 65+                                     | 0.05*                           | 0.01        | 0.24        | 0.05*                                                    | 0.01        | 0.24        | 0.06*                                                            | 0.01        | 0.27        |
| Female                                      | 0.40*                           | 0.27        | 0.59        | 0.40*                                                    | 0.27        | 0.59        | 0.38*                                                            | 0.26        | 0.57        |
| Ratio of individual income to city income   | 1.05*                           | 1.00        | 1.09        | 1.04*                                                    | 1.00        | 1.09        | 1.04                                                             | 0.99        | 1.09        |
| In top 50% of country-level education       | 1.78*                           | 1.15        | 2.75        | 1.77*                                                    | 1.13        | 2.77        | 1.72*                                                            | 1.13        | 2.62        |
| Married                                     | 1.92*                           | 1.09        | 3.40        | 1.92*                                                    | 1.08        | 3.42        | 2.23*                                                            | 1.19        | 4.16        |
| Migrant to megacity                         | 0.83                            | 0.54        | 1.29        | 0.83                                                     | 0.54        | 1.29        | 0.78                                                             | 0.49        | 1.24        |
| Unemployed                                  | 5.01*                           | 2.23        | 11.24       | 5.01*                                                    | 2.24        | 11.23       | 5.71*                                                            | 2.50        | 13.05       |
| <i>Neighborhood-level fixed effects</i>     |                                 |             |             |                                                          |             |             |                                                                  |             |             |
| Ratio of neighborhood income to city income |                                 |             |             | 1.01                                                     | 0.73        | 1.42        |                                                                  |             |             |

|                                 |                   |                        |         |                   |                        |         |                   |                        |         |
|---------------------------------|-------------------|------------------------|---------|-------------------|------------------------|---------|-------------------|------------------------|---------|
| Percent married in neighborhood |                   |                        |         |                   |                        |         | 0.98*             | 0.97                   | 0.99    |
| <i>Random effects</i>           | Variance estimate | Zero G test chi square | p-value | Variance estimate | Zero G test chi square | p-value | Variance estimate | Zero G test chi square | p-value |
|                                 | Intercept         | 0.12                   | 1.80    | .090              | 0.12                   | 1.80    | .090              | 0.08                   | 1.01    |

\* =  $P < 0.05$

<sup>a</sup> Externalizing disorders include behavioral (intermittent explosive disorder) and substance use (alcohol and drug abuse with or without dependence) disorders

<sup>b</sup> Models include the above variables as well as fixed effects for city and for having a missing (“don’t know” or refused) value on individual unemployment

For the neighborhood-level exposures, results were very similar to those with lifetime externalizing disorder as the outcome. Higher neighborhood-level income was not statistically significant (second column), but neighborhood-level percentage of married individuals (third column) was again statistically associated with lower odds of externalizing disorder (OR: 0.98, 95% CI: 0.97-0.99). As an alternative interpretation, when split into tertiles for a categorical exposure variable, living in a neighborhood in the top tertile of percent of married residents was associated with a 54% decreased odds of past-year externalizing disorder (OR: 0.46, 95% CI: 0.24-0.87).

## DISCUSSION

Using multilevel models with data from three of the largest cities in China, we found that after accounting for individual-level marital status, residence in neighborhoods with a higher proportion of married individuals was associated with lower odds of both past-year and lifetime externalizing, but not internalizing, mental disorders. Contrary to our expectations, living in a neighborhood with a

1  
2  
3 higher median income compared to the city median income was not significantly associated with  
4  
5 lower odds either internalizing or externalizing of disorder.  
6  
7

8  
9  
10 Despite the differences in samples, this finding is similar that of Roosa and colleagues who found  
11  
12 that neighborhood disadvantage was not associated as a main effect with internalizing or  
13  
14 externalizing symptoms in a sample of Mexican American youth.(17) However, it is at odds with the  
15  
16 finding by Hurd et al that African American adolescents in the United States who lived in areas of  
17  
18 higher neighborhood poverty were more likely to have internalizing symptoms as mediated by lower  
19  
20 social support.(16)  
21  
22

23  
24  
25 Two mechanisms have been proposed to explain general associations between lower income or  
26  
27 social capital with higher odds of mental disorders: social causation and social selection.(33, 34)  
28  
29 The latter posits that individuals with mental disorders have a predisposition to drift into lower  
30  
31 socioeconomic positions, while the former attributes the association to the stress and adversity that  
32  
33 comes with having low socioeconomic status. The pathways through which neighborhood income  
34  
35 may affect mental disorders are likely multifactorial and at least partially mediated by individual  
36  
37 socioeconomic status, but neighborhood features and social cohesion are likely to explain some of  
38  
39 this association,(10) as was the case in Hurd et al's study.(16) We were not able to test these  
40  
41 hypotheses directly due to the cross-sectional nature of our data, but our results suggest that, in the  
42  
43 context of adults living in urban China, neighborhood income does not in fact appear to be an  
44  
45 important driver of mental health outcomes.  
46  
47  
48  
49

50  
51 To our knowledge, the proportion of married individuals in a neighborhood has not been studied in  
52  
53 relation to internalizing and externalizing mental disorders. At the individual level, marital status is  
54  
55 very often shown to be associated with mental disorders.(35, 36) The inverse association of  
56  
57 neighborhood-level percentage of married individuals and externalizing disorders found in our study  
58  
59  
60

1  
2  
3 suggests a protective community effect of marriage, possibly through its effect on social cohesion.

4  
5 The social control (or social bond) theory primarily used in criminology, which states that traditional  
6  
7 social relationships may buffer against externalizing behavior in the form of crime,(37) may  
8  
9 potentially be extended to our results in terms of communities of married families acting as a buffer  
10  
11 against its residents developing externalizing disorders such as substance abuse.  
12  
13

14  
15  
16 Additionally, living in a neighborhood with more married individuals has been associated with  
17  
18 higher neighborhood satisfaction,(38) and marital status is frequently associated with more political  
19  
20 participation and social support.(24) We were not able to directly analyze neighborhood social  
21  
22 cohesion with our data, but we welcome new studies that test this hypothesis. Another possible  
23  
24 explanation is that the neighborhood marriage distribution is an indicator of other neighborhood  
25  
26 characteristics not measured. For example, previous studies in other contexts have found that areas  
27  
28 with higher marriage rates also have more upward mobility,(39, 40) which could plausibly affect  
29  
30 local mental health.  
31  
32

33  
34  
35 Despite our focus on contextual (neighborhood-level) exposures in this analysis, we also  
36  
37 unexpectedly found that being married as an individual and being more highly educated were both  
38  
39 associated a with higher odds of externalizing disorders, and having higher individual income  
40  
41 relative to the city median was associated at the individual level with higher odds of both  
42  
43 internalizing and externalizing disorders. These results were unexpected in contrast to findings in  
44  
45 other parts of the world.(41) However, we propose that in the context of Chinese cities, these  
46  
47 characteristics may be indicators of added family or job-related stress resulting from marriage and  
48  
49 higher education, especially when controlling for unemployment and for proxies of social cohesion  
50  
51 at the neighborhood level. Being married was also found to be an individual risk factor for any  
52  
53 disorder in an earlier analysis using WMH data in Beijing and Shanghai only; never having been  
54  
55 married was significantly protective against any past-year disorder.(14) The relationship between  
56  
57  
58  
59  
60

1  
2  
3 marital status and mental disorder also depends on the timing of each condition (41) as well as  
4  
5 severity and type of disorder,(14) which could be focuses for future papers using urban Chinese  
6  
7 data, but were not our focus here.  
8  
9

10  
11 These results should be interpreted in the context of a few limitations. First, due to the cross-  
12  
13 sectional nature of this study, we cannot exclude the possibility of reverse causation that  
14  
15 concentrates individuals with externalizing mental disorders in neighborhoods with fewer married  
16  
17 individuals, as posited by the social selection theory.(33) Although this potential for reverse  
18  
19 causation cannot be discarded, recent systematic reviews have suggested that there is a consistent  
20  
21 association of neighborhood characteristics with mental health.(42) Further, Dohrenwent and  
22  
23 colleagues found that social causation was a more likely theory than social selection for substance  
24  
25 use disorders in men.(33) Men with substance use disorders are a primary group of those  
26  
27 characterized as having externalizing disorder in our study, the outcome for which we found the  
28  
29 significant relationship with neighborhood marital status, suggesting that there may in fact be a  
30  
31 causal link.  
32  
33  
34  
35  
36  
37

38 As a second limitation, our study relied on data from lay interviews instead of clinician-administered  
39  
40 interviews, which could affect estimates of disease prevalence and predictors. However, our  
41  
42 diagnostic assessments have been validated with blinded clinical reappraisal interviews.(31)  
43  
44  
45

46 Third, our sample is not necessarily representative of today's urban China, given that the data were  
47  
48 collected in the early 2000's, or of other large urban areas of China not sampled. Even across the  
49  
50 three cities we assessed, there are important differences, most notably the fact that Beijing and  
51  
52 Shanghai are two of the oldest large cities in China, while Shenzhen is a migrant industrial city that  
53  
54 evolved based on its designation in 1980 as the first PRC Special Economic Zone. In order to  
55  
56 control for city-level differences in costs of living, we measured individual income as the ratio of  
57  
58  
59  
60

1  
2  
3 individual income to median city-level income, but other differences may remain. In our sample,  
4  
5 Beijing had the highest prevalence of disorder, followed by Shenzhen and then Shanghai, and we  
6  
7 included city as a control variable in our models.  
8  
9

10  
11 Further, socioeconomic characteristics likely have differential effects on the health of migrants  
12  
13 depending on the culture and area of origin,(43) which could modify our results. Some new  
14  
15 neighborhoods in China, especially in Shenzhen, are composed of groups of migrants of similar  
16  
17 ages, originating from the same areas, and living in small areas such as dormitories(44) where high  
18  
19 social cohesion could influence mental health outcomes. Our analysis of migration was limited by  
20  
21 the absence of detailed data on the respondents' area of origin and current housing. However, we did  
22  
23 statistically control for whether the respondent grew up mostly in a large city. Future studies should  
24  
25 investigate the associations of these factors with mental disorders in a sample with more detailed  
26  
27 information on migration status.  
28  
29  
30  
31

32  
33 Despite these limitations, our study is the first to investigate the associations of neighborhood  
34  
35 characteristics with mental disorders in large urban areas of China, providing data that may be  
36  
37 consistent with previous concerns about the mental health effects of community disruption created  
38  
39 by rapid urbanization.(45, 46)  
40  
41  
42  
43

44  
45 Mental disorders are a growing public health problem in China. The government has recently taken  
46  
47 steps to address the problem by creating hundreds of new psychiatric hospitals and integrating its  
48  
49 resources with existing community health systems.(45) A few recent sociodemographic changes  
50  
51 such as the increasing globalization of its economy and the end of the one-child policy may also  
52  
53 significantly improve neighborhood characteristics. However, more progress will likely be needed to  
54  
55 develop broad social measures for enhancing social cohesion, participation, and support to help  
56  
57 manage the consequences of decades of under-diagnosed mental disorders.  
58  
59  
60

1  
2  
3  
4  
5 The large and rapid urbanization process that China went through during the past few decades has  
6  
7 been recently replicated, on a much smaller scale, in other countries. While there are important early  
8  
9 benefits of urbanization, the frequently chaotic expansion of urban areas can be associated with  
10  
11 community disruption and the worsening of health outcomes. A growing number of low-income  
12  
13 individuals now live in large urban areas that do not provide the social support and stability found in  
14  
15 smaller communities. Understanding the effects of neighborhood characteristics on mental disorders  
16  
17 in fast growing regions of the world can help to promote better neighborhood environments and  
18  
19 control the burden of mental disorders in emerging countries.  
20  
21  
22  
23

24  
25 One direction for future research would be to further investigate the role of migration. A high  
26  
27 proportion of individuals in our sample and in urban China as a whole were born in rural areas.  
28  
29 Migrating from rural to urban areas is not only prevalent in China, but also likely to be associated  
30  
31 with both marital status and income in addition to mental health.<sup>(13)</sup> Investigators should continue  
32  
33 to study the relationships among important neighborhood-level indicators of health, including a  
34  
35 more specific measure of migration status at both an individual and neighborhood level. Finally,  
36  
37 another potentially fruitful direction for future research could be to investigate how the distribution  
38  
39 of mental disorders at the neighborhood-level might act as a potential predictor for individual  
40  
41 disorder outcomes, preferably in a longitudinal setting.  
42  
43  
44  
45  
46  
47  
48  
49  
50  
51  
52  
53  
54  
55  
56  
57  
58  
59  
60

**Contributors:**

Chiavegatto Filho ADP designed initial statistical analyses; conducted the literature review; performed preliminary analyses; wrote the introduction and discussion sections; and critically edited all versions of the manuscript. Sampson L aided in the literature review and writing of introduction and discussion sections; wrote the methods and results sections; designed the revised analyses; created tables; and critically edited all versions of the manuscript. Martins SS helped to design statistical analyses; participated in interpretation of results; and critically edited all versions of the manuscript. Yu S performed statistical analyses; created tables; and critically edited all versions of the manuscript. Huang Y carried out the Beijing data acquisition; participated in interpretation of results; and critically edited all versions of the manuscript. He Y carried out the Shanghai data acquisition; participated in interpretation of results; and critically edited all versions of the manuscript. Lee S coordinated data acquisition and critically edited all versions of the manuscript. Hu C carried out the Shenzhen data acquisition and critically edited all versions of the manuscript. Zaslavsky AM designed data analyses; provided statistical support; participated in interpretation of results; and critically edited all versions of the manuscript. Kessler RC conceptualized and coordinated the study; participated in interpretation of results; and critically edited all versions of the manuscript. Galea S conceptualized the analyses; formulated hypotheses; led the analytic team; and critically edited all versions of the manuscript. All authors approved the final version and stand behind all aspects of the work.

**Competing interests:** In the past three years, Dr. Kessler received support for his epidemiological studies from Sanofi Aventis; was a consultant for Johnson & Johnson Wellness and Prevention, Shire, Takeda; and served on an advisory board for the Johnson & Johnson Services Inc. Lake Nona Life Project. Kessler is a co-owner of DataStat, Inc., a market research firm that carries out healthcare research. Other authors have no financial or personal conflicts of interest to disclose.



1  
2  
3 **Funding/Support:** This study was carried out in conjunction with the World Health Organization  
4  
5 World Mental Health (WMH) Survey Initiative which is supported by the National Institute of  
6  
7 Mental Health (NIMH; R01 MH070884), the John D. and Catherine T. MacArthur Foundation, the  
8  
9 Pfizer Foundation, the US Public Health Service (R13-MH066849, R01- MH069864, and R01  
10  
11 DA016558), the Fogarty International Center (FIRCA R03-TW006481), the Pan American Health  
12  
13 Organization, Eli Lilly and Company, Ortho-McNeil Pharmaceutical, GlaxoSmithKline, and Bristol-  
14  
15 Myers Squibb. We thank the staff of the WMH Data Collection and Data Analysis Coordination  
16  
17 Centres for assistance with instrumentation, fieldwork, and consultation on data analysis. None of  
18  
19 the funders had any role in the design, analysis, interpretation of results, or preparation of this paper.  
20  
21 A complete list of all within-country and cross-national WMH publications can be found at  
22  
23 <http://www.hcp.med.harvard.edu/wmh/>. The Chinese World Mental Health Survey Initiative is  
24  
25 supported by the Pfizer Foundation. The Shenzhen Mental Health Survey is supported by the  
26  
27 Shenzhen Bureau of Health and the Shenzhen Bureau of Science, Technology, and Information. The  
28  
29 analyses were partially supported by the Fundação de Amparo à Pesquisa do Estado de São Paulo  
30  
31 (FAPESP, grant number: 14/05363-7).  
32  
33  
34  
35  
36  
37

38 **Patient consent:** Written, informed consent after a full description of the study was obtained from  
39  
40 all participants before conducting the surveys in accordance with the ethical standards laid down in  
41  
42 the 1964 Declaration of Helsinki and its later amendments. These consent procedures were approved  
43  
44 by the Institutional Review Boards of the Shenzhen Institute of Mental Health and the Research  
45  
46 Center for Contemporary China in Beijing.  
47  
48  
49  
50

51 **Data sharing statement:** Access to the cross-national World Mental Health (WMH) data is  
52  
53 governed by the organizations funding and responsible for survey data collection in each country.  
54  
55  
56  
57  
58  
59  
60

1  
2  
3 These organizations made data available to the WMH consortium through restricted data sharing  
4  
5 agreements that do not allow us to release the data to third parties.  
6  
7  
8  
9  
10  
11  
12  
13  
14  
15  
16  
17  
18  
19  
20  
21  
22  
23  
24  
25  
26  
27  
28  
29  
30  
31  
32  
33  
34  
35  
36  
37  
38  
39  
40  
41  
42  
43  
44  
45  
46  
47  
48  
49  
50  
51  
52  
53  
54  
55  
56  
57  
58  
59  
60

For peer review only

**REFERENCES**

1. National Bureau of Statistics of China 2012 [Available from: <http://www.stats.gov.cn/english/statisticaldata/AnnualData/>].
2. Gong P, Liang S, Carlton EJ, Jiang Q, Wu J, Wang L, et al. Urbanisation and health in China. *Lancet* (London, England). 2012;379(9818):843-52.
3. Collins PY, Patel V, Joestl SS, March D, Insel TR, Daar AS. Grand challenges in global mental health: A consortium of researchers, advocates and clinicians announces here research priorities for improving the lives of people with mental illness around the world, and calls for urgent action and investment. *Nature*. 2011;475(7354):27-30.
4. Yang G, Wang Y, Zeng Y, Gao GF, Liang X, Zhou M, et al. Rapid health transition in China, 1990–2010: findings from the Global Burden of Disease Study 2010. *The Lancet*. 2013;381(9882):1987-2015.
5. Yu W, Chiu C. Growing Pains: Changes in Psychological Well-being in Urban China. *Social Indicators Research*. 2016;129(3):1349-82.
6. Phillips MR, Zhang J, Shi Q, Song Z, Ding Z, Pang S, et al. Prevalence, treatment, and associated disability of mental disorders in four provinces in China during 2001-05: an epidemiological survey. *Lancet* (London, England). 2009;373(9680):2041-53.
7. WHO. Closing the gap in a generation: Health equity through action on the social determinants of health. Geneva, Switzerland: 2008.
8. WHO. Discussion Paper Series on Social Determinants of Health. Geneva, Switzerland: 2010 Contract No.: December 26.
9. Piketty T. *Capital in the Twenty-First Century*. Cambridge, MA: Belknap Press; 2014.
10. Mair C, Diez Roux AV, Galea S. Are neighbourhood characteristics associated with depressive symptoms? A review of evidence. *Journal of epidemiology and community health*. 2008;62(11):940-6, 8 p following 6.

- 1  
2  
3 11. Muntaner C, Eaton WW, Miech R, O'Campo P. Socioeconomic Position and Major Mental  
4 Disorders. *Epidemiologic Reviews*. 2004;26(1):53-62.  
5
- 6  
7 12. Nieuwenhuis J, van Ham M, Yu R, Branje S, Meeus W, Hooimeijer P. Being Poorer Than  
8 the Rest of the Neighborhood: Relative Deprivation and Problem Behavior of Youth. *Journal of*  
9 youth and adolescence. 2017.  
10
- 11  
12 13. Wen M, Fan J, Jin L, Wang G. Neighborhood effects on health among migrants and natives  
13 in Shanghai, China. *Health & Place*. 2010;16:452-60.  
14
- 15  
16 14. Shen YC, Zhang MY, Huang YQ, He YL, Liu ZR, Cheng H, et al. Twelve-month  
17 prevalence, severity, and unmet need for treatment of mental disorders in metropolitan China.  
18 *Psychological medicine*. 2006;36(2):257-67.  
19
- 20  
21 15. Krueger RF, McGue M, Iacono WG. The higher-order structure of common DSM mental  
22 disorders: internalization, externalization, and their connections to personality. *Personality and*  
23 Individual Differences. 2001;30(7):1245-59.  
24
- 25  
26 16. Hurd NM, Stoddard SA, Zimmerman MA. Neighborhoods, social support, and african  
27 american adolescents' mental health outcomes: a multilevel path analysis. *Child development*.  
28 2013;84(3):858-74.  
29
- 30  
31 17. Roosa MW, Burrell GL, Nair RL, Cox S, Tein J-Y, Knight GP. Neighborhood  
32 Disadvantage, Stressful Life Events, and Adjustment Among Mexican American Early Adolescents.  
33 *The Journal of Early Adolescence*. 2010;30(4):567-92.  
34
- 35  
36 18. Signorello LB, Cohen SS, Williams DR, Munro HM, Hargreaves MK, Blot WJ.  
37 Socioeconomic status, race, and mortality: a prospective cohort study. *American journal of public*  
38 health. 2014;104(12):e98-e107.  
39
- 40  
41 19. Pickett KE, Pearl M. Multilevel analyses of neighbourhood socioeconomic context and  
42 health outcomes: a critical review. *Journal of epidemiology and community health*. 2001;55(2):111-  
43  
44  
45  
46  
47  
48  
49  
50  
51  
52  
53  
54  
55  
56  
57  
58  
59  
60

- 1  
2  
3 20. Braveman P, Egerter S, Williams DR. The social determinants of health: coming of age.  
4  
5 Annual review of public health. 2011;32:381-98.  
6  
7  
8 21. Astell-Burt T, Mitchell R, Hartig T. The association between green space and mental health  
9  
10 varies across the lifecourse. A longitudinal study. Journal of epidemiology and community health.  
11  
12 2014.  
13  
14 22. Albor C, Uphoff EP, Stafford M, Ballas D, Wilkinson RG, Pickett KE. The effects of  
15  
16 socioeconomic incongruity in the neighbourhood on social support, self-esteem and mental health in  
17  
18 England. Social science & medicine (1982). 2014;111:1-9.  
19  
20  
21 23. Rios R, Aiken LS, Zautra AJ. Neighborhood contexts and the mediating role of  
22  
23 neighborhood social cohesion on health and psychological distress among Hispanic and non-  
24  
25 Hispanic residents. Annals of behavioral medicine : a publication of the Society of Behavioral  
26  
27 Medicine. 2012;43(1):50-61.  
28  
29  
30 24. Xu Q, Perkins DD, Chow JC. Sense of community, neighboring, and social capital as  
31  
32 predictors of local political participation in China. American journal of community psychology.  
33  
34 2010;45(3-4):259-71.  
35  
36  
37 25. Hu C. The impact of migration and mental disorders on suicidal behaviors: an  
38  
39 epidemiological survey among general population in Shenzhen, China. Submitted for the degree of  
40  
41 Doctor of Philosophy in Social Work & Social Administration at the University of Hong Kong.  
42  
43 2008.  
44  
45  
46 26. Heeringa SG, Wells EJ, Hubbard F, Mneimneh ZN, Chiu WT, Sampson NA, et al. Sample  
47  
48 designs and sampling procedures. In: Kessler RC, Üstün TB, editors. The WHO World Mental  
49  
50 Health Surveys: Global perspectives on the epidemiology of mental disorders. New York, New  
51  
52 York: Cambridge University Press; 2008. p. 14–32.  
53  
54  
55 27. Harkness J, Pennell BE, Villar A, Gebler N, Aguilar-Gaxiola S, Bilgen I. Translation  
56  
57 procedures and translation assessment in the World Mental Health Survey Initiative. In: Kessler RC,  
58  
59 Üstün TB, editors. The WHO World Mental Health Surveys: Global perspectives on the  
60

1  
2  
3 epidemiology of mental disorders. New York, New York: Cambridge University Press; 2008. p. 91–  
4  
5 113.

6  
7 28. Kessler RC, Ustun TB. The World Mental Health (WMH) Survey Initiative Version of the  
8  
9 World Health Organization (WHO) Composite International Diagnostic Interview (CIDI).  
10  
11 International Journal of Methods in Psychiatric Research. 2004;13(2):93-121.

12  
13 29. Diagnostic and Statistical Manual of Mental Disorders: DSM-IV-TR. Fourth ed.  
14  
15 Washington, DC.: American Psychiatric Association; 2000.

16  
17 30. First MB, Spitzer RL, Gibbon M, Williams JBW. Structured Clinical Interview for DSM-  
18  
19 IV-TR Axis I Disorders, Research Version, Patient Edition (SCID-I/P). New York, New York:  
20  
21 Biometrics Research, New York State Psychiatric Institute; 2002.

22  
23 31. Haro JM, Arbabzadeh-Bouchez S, Brugha TS, de Girolamo G, Guyer ME, Jin R, et al.  
24  
25 Concordance of the Composite International Diagnostic Interview Version 3.0 (CIDI 3.0) with  
26  
27 standardized clinical assessments in the WHO World Mental Health surveys. International journal of  
28  
29 methods in psychiatric research. 2006;15(4):167-80.

30  
31 32. Ene M, Leighton EA, Blue GL, Bell BA. Paper 3430-2015: Multilevel Models for  
32  
33 Categorical Data Using SAS® PROC GLIMMIX: The Basics 2015 [Available from:  
34  
35 <https://support.sas.com/resources/papers/proceedings15/3430-2015.pdf>.

36  
37 33. Dohrenwend BP, Levav I, Shrout PE, Schwartz S, Naveh G, Link BG, et al. Socioeconomic  
38  
39 status and psychiatric disorders: the causation-selection issue. Science (New York, NY).  
40  
41 1992;255(5047):946-52.

42  
43 34. Sareen J, Afifi TO, McMillan KA, Asmundson GJ. Relationship between household income  
44  
45 and mental disorders: findings from a population-based longitudinal study. Archives of general  
46  
47 psychiatry. 2011;68(4):419-27.

48  
49 35. Kessler RC, Berglund P, Demler O, Jin R, Merikangas KR, Walters EE. Lifetime  
50  
51 prevalence and age-of-onset distributions of DSM-IV disorders in the National Comorbidity Survey  
52  
53 Replication. Archives of general psychiatry. 2005;62(6):593-602.

- 1  
2  
3 36. Ye M, Chen Y. The influence of domestic living arrangement and neighborhood identity on  
4 mental health among urban Chinese elders. *Aging & mental health*. 2014;18(1):40-50.  
5  
6  
7 37. Hirschi T. *Causes of Delinquency*. Berkeley, CA: University of California Press; 1969.  
8  
9  
10 38. Hipp J. What is the "neighbourhood" in neighbourhood satisfaction? Comparing the effects  
11 of structural characteristics measured at the micro-neighbourhood and tract levels. *Urban studies*  
12 (Edinburgh, Scotland). 2010;47(12):2517-536.  
13  
14  
15  
16 39. Chetty R, Hendren N. The impacts of neighborhoods on intergenerational mobility:  
17 Childhood exposure effects and county-level estimates. *The National Bureau of Economics*  
18 *Research*. 2015.  
19  
20  
21  
22  
23 40. Wilcox WB, Price J, Lerman RI. *Strong families, prosperous states: Do healthy families*  
24 *affect the wealth of states?* The American Enterprise Institute; Institute for Family Studies, 2015.  
25  
26  
27 41. Breslau J, Miller E, Jin R, Andrade LH, Chatterji S, Medina-Mora ME, et al. Mental  
28 disorders, marriage, and divorce. In: Alonso J, Chatterji S, He Y, editors. *The Burden of Mental*  
29 *Disorders: Global Perspectives from the WHO World Mental Health Surveys*. Cambridge, United  
30 Kingdom: Cambridge University Press; 2013.  
31  
32  
33  
34  
35  
36 42. Ribeiro WS, Bauer A, Andrade MCR, York-Smith M, Pan PM, Pingani L, et al. Income  
37 inequality and mental illness-related morbidity and resilience: a systematic review and meta-  
38 analysis. *The Lancet Psychiatry*.4(7):554-62.  
39  
40  
41  
42 43. Sardadvar S. How migrant status affects health beyond socioeconomic status: Evidence  
43 from Austria. *International Migration Review*. 2015;49(4):843-77.  
44  
45  
46  
47 44. Wang YP, Wang Y, Wu J. Housing migrant workers in rapidly urbanizing regions: A study  
48 of the Chinese model in Shenzhen. *Housing Studies*. 2010;25(1).  
49  
50  
51 45. Xiang YT, Yu X, Sartorius N, Ungvari GS, Chiu HF. Mental health in China: challenges  
52 and progress. *Lancet (London, England)*. 2012;380(9855):1715-6.  
53  
54  
55  
56  
57  
58  
59  
60

1  
2  
3 46. Yan M. Experiences of Poverty and Shame in Urban China. In: Chase E, Bantebya-  
4  
5 Kyomuhendo G, editors. Poverty and Shame: Global Experiences. Oxford, United Kingdom: Oxford  
6  
7 University Press; 2014.  
8  
9  
10  
11  
12  
13  
14  
15  
16  
17  
18  
19  
20  
21  
22  
23  
24  
25  
26  
27  
28  
29  
30  
31  
32  
33  
34  
35  
36  
37  
38  
39  
40  
41  
42  
43  
44  
45  
46  
47  
48  
49  
50  
51  
52  
53  
54  
55  
56  
57  
58  
59  
60

For peer review only



STROBE 2007 (v4) Statement—Checklist of items that should be included in reports of *cross-sectional studies*

| Section/Topic                | Item # | Recommendation                                                                                                                                                                       | Reported on page # |
|------------------------------|--------|--------------------------------------------------------------------------------------------------------------------------------------------------------------------------------------|--------------------|
| Title and abstract           | 1      | (a) Indicate the study's design with a commonly used term in the title or the abstract                                                                                               | 3                  |
|                              |        | (b) Provide in the abstract an informative and balanced summary of what was done and what was found                                                                                  | 3                  |
| <b>Introduction</b>          |        |                                                                                                                                                                                      |                    |
| Background/rationale         | 2      | Explain the scientific background and rationale for the investigation being reported                                                                                                 | 5-7                |
| Objectives                   | 3      | State specific objectives, including any prespecified hypotheses                                                                                                                     | 6                  |
| <b>Methods</b>               |        |                                                                                                                                                                                      |                    |
| Study design                 | 4      | Present key elements of study design early in the paper                                                                                                                              | 7-9                |
| Setting                      | 5      | Describe the setting, locations, and relevant dates, including periods of recruitment, exposure, follow-up, and data collection                                                      | 8                  |
| Participants                 | 6      | (a) Give the eligibility criteria, and the sources and methods of selection of participants                                                                                          | 7-9                |
| Variables                    | 7      | Clearly define all outcomes, exposures, predictors, potential confounders, and effect modifiers. Give diagnostic criteria, if applicable                                             | 10-11              |
| Data sources/<br>measurement | 8*     | For each variable of interest, give sources of data and details of methods of assessment (measurement). Describe comparability of assessment methods if there is more than one group | 10-11              |
| Bias                         | 9      | Describe any efforts to address potential sources of bias                                                                                                                            | 9                  |
| Study size                   | 10     | Explain how the study size was arrived at                                                                                                                                            | 9                  |
| Quantitative variables       | 11     | Explain how quantitative variables were handled in the analyses. If applicable, describe which groupings were chosen and why                                                         | 10-11              |
| Statistical methods          | 12     | (a) Describe all statistical methods, including those used to control for confounding                                                                                                | 11-12              |
|                              |        | (b) Describe any methods used to examine subgroups and interactions                                                                                                                  | N/A                |
|                              |        | (c) Explain how missing data were addressed                                                                                                                                          | 9                  |
|                              |        | (d) If applicable, describe analytical methods taking account of sampling strategy                                                                                                   | 9, 11-13           |
|                              |        | (e) Describe any sensitivity analyses                                                                                                                                                | 12                 |
| <b>Results</b>               |        |                                                                                                                                                                                      |                    |

|                          |     |                                                                                                                                                                                                              |              |
|--------------------------|-----|--------------------------------------------------------------------------------------------------------------------------------------------------------------------------------------------------------------|--------------|
| Participants             | 13* | (a) Report numbers of individuals at each stage of study—eg numbers potentially eligible, examined for eligibility, confirmed eligible, included in the study, completing follow-up, and analysed            | 9            |
|                          |     | (b) Give reasons for non-participation at each stage                                                                                                                                                         | 9            |
|                          |     | (c) Consider use of a flow diagram                                                                                                                                                                           |              |
| Descriptive data         | 14* | (a) Give characteristics of study participants (eg demographic, clinical, social) and information on exposures and potential confounders                                                                     | 13-14        |
|                          |     | (b) Indicate number of participants with missing data for each variable of interest                                                                                                                          | 9            |
| Outcome data             | 15* | Report numbers of outcome events or summary measures                                                                                                                                                         | 14           |
| Main results             | 16  | (a) Give unadjusted estimates and, if applicable, confounder-adjusted estimates and their precision (eg, 95% confidence interval). Make clear which confounders were adjusted for and why they were included | 10-11, 15-24 |
|                          |     | (b) Report category boundaries when continuous variables were categorized                                                                                                                                    | N/A          |
|                          |     | (c) If relevant, consider translating estimates of relative risk into absolute risk for a meaningful time period                                                                                             | N/A          |
| Other analyses           | 17  | Report other analyses done—eg analyses of subgroups and interactions, and sensitivity analyses                                                                                                               | 12,19,24     |
| <b>Discussion</b>        |     |                                                                                                                                                                                                              |              |
| Key results              | 18  | Summarise key results with reference to study objectives                                                                                                                                                     | 24-25        |
| Limitations              | 19  | Discuss limitations of the study, taking into account sources of potential bias or imprecision. Discuss both direction and magnitude of any potential bias                                                   | 27-28        |
| Interpretation           | 20  | Give a cautious overall interpretation of results considering objectives, limitations, multiplicity of analyses, results from similar studies, and other relevant evidence                                   | 25-28        |
| Generalisability         | 21  | Discuss the generalisability (external validity) of the study results                                                                                                                                        | 27           |
| <b>Other information</b> |     |                                                                                                                                                                                                              |              |
| Funding                  | 22  | Give the source of funding and the role of the funders for the present study and, if applicable, for the original study on which the present article is based                                                | 31           |

\*Give information separately for cases and controls in case-control studies and, if applicable, for exposed and unexposed groups in cohort and cross-sectional studies.

**Note:** An Explanation and Elaboration article discusses each checklist item and gives methodological background and published examples of transparent reporting. The STROBE checklist is best used in conjunction with this article (freely available on the Web sites of PLoS Medicine at <http://www.plosmedicine.org/>, Annals of Internal Medicine at <http://www.annals.org/>, and Epidemiology at <http://www.epidem.com/>). Information on the STROBE Initiative is available at [www.strobe-statement.org](http://www.strobe-statement.org).
